# Supplementary material
Source: PubMed Central journal article supplement (PMC6251008)
Supplement: blood787390-suppl1.pdf [file blood787390-suppl1.pdf]

## Supplemental Methods and Materials

### ***Patients***

A total of 799 patients with various myeloid neoplasms (MNs) (n = 575), BMFs (n = 105) and other hematologic disorders (n = 119) were screened. All samples were obtained after written informed consent, according to protocols approved by the Institutional Review Board of participating institutions. The patients with myeloid neoplasm consisted of MDS (n = 422), acute myeloid leukemia (AML) (n = 98), and MDS/myeloproliferative neoplasms (MPN) (n = 55). Most (78/98, 80%) AML patients had secondary (post-MDS) disease. The BMF cohorts were aplastic anemia (AA) (n = 47), paroxysmal nocturnal hemoglobinuria (PNH) (n = 40), and pure red cell aplasia (PRCA) (n = 18). The other hematologic disorders were large granular lymphocytic leukemia (n = 55) and idiopathic cytopenia of undetermined significance (n = 20). We sequenced all patients for the presence of *SAMD9/SAMD9L* variants. Paired disease and normal GL DNA were obtained from 220 MN patients for whole exome sequencing (WES). GL DNA was obtained from either buccal mucosa or CD3 positive T cells which were purified from peripheral blood with or without prior culture in the presence of PHA and IL-2<sup>1</sup>. Disease DNA was extracted from bone marrow or peripheral blood. 579 patients were evaluated by targeted capture sequencing. We used Broad Institute's Genome Aggregation Database (gnomAD) as healthy controls (n = 138,632) which included 123,136 WES and 15,496 whole-genome sequences from unrelated individuals<sup>2</sup>. After comparing ethnicities between gnomAD and our cohort<sup>2,3</sup>, we matched healthy controls to patients by ethnicities (Supplemental Figure 3).

### ***Whole exome sequencing***

WES was performed as previously described<sup>1,4</sup>. Paired disease and normal GL DNAs were used. Whole-exome capture was accomplished through hybridization of sonicated genomic DNA to a bait cDNA library synthesized on magnetic beads (SureSelect Human All Exon 50Mb or V4 kit, Agilent Technologies). Captured targets were subjected to massively parallel sequencing using a HiSeq 2000 (Illumina) according to the standard protocol for 100-bp paired-end reads. Subsequent validation and confirmatory sequencing are described below. Briefly, sequencing reads were aligned to the human genome (hg19) by a Burrows-Wheeler aligner (<http://bio-bwa.sourceforge.net/>). We used a GATK pipeline to extract candidate variants/polymorphisms and to remove sequencing errors. Validations were performed by Sanger or PCR amplicon sequencing<sup>4</sup>.

### ***Targeted Capture Sequencing***

Targeted capture sequencing was performed using a TruSeq Custom Amplicon or Nextera Rapid capture custom enrichment kit (Illumina) as previously described<sup>4,5</sup>. The targeted 46 genes were captured (Supplemental Table 2 and 3). Sequencing libraries were generated according to an Illumina paired-end library protocol. The enriched targets were subjected to massive sequencing using HiSeq 2000 or MiSeq sequencer (Illumina), with sufficient read coverage (Supplemental Figure 2). Variants were annotated using ANNOVAR<sup>6</sup> and filtered by removing: i) synonymous single nucleotide variants; ii) variants only present in unidirectional reads; iii) variants in repetitive genomic regions. Only variants with minimum depth of 20 and with 5 positive, high quality reads, were considered. Variant allelic frequencies were adjusted according to zygosity and copy number based on single nucleotide polymorphism array results<sup>5</sup>. Finally, mapping errors were removed by visual inspection with the Integral Genomics Viewer. Validation by Sanger sequencing or PCR amplicon sequencing was performed as previously described<sup>5</sup>.

### ***Criteria of rare variants and pathogenic missense variants***

We defined “rare variants” of *SAMD9/SAMD9L* genes as those present in <0.1% of ethnically-matched healthy controls (Supplemental Figure 3). To predict functional effects of specific *SAMD9* missense variants, we focused on *SAMD9* germline variants reported in previous papers<sup>7,8</sup> or public databases of healthy donors. 39 variants were identified, 23 out of 39 were deemed “truly pathogenic” variants by confirming that there was a significant phenotype using a functional assay and by examining familial disease phenotype co-segregations (Supplemental Table 5). ROC curves of 8 different algorithms<sup>9-13</sup> were created (Supplemental figure 4), and Areas Under the Curves (AUC) were compared between them (Supplemental Table 6). We set a strict cut-off to discover missense variants with high probabilities of pathogenesis, even if it reduces the sensitivity. The top 5 algorithms in terms of greatest AUC were chosen and variants with  $\geq 3$  positive scores out of the top 5 algorithms were defined as “Pathogenic”. Applying this criteria to 39 variants already confirmed to be pathogenic or not yielded 9 as positive and 7 as truly pathogenic (Supplemental figure 5). Given that 23 were truly pathogenic and 16 were not, sensitivity and specificity were 30% ( $7/(7+16)$ ) and 88% ( $14/(14+2)$ ), respectively.

### ***Metaphase cytogenetics***

Chromosome preparations were G-banded using trypsin and Giemsa, and karyotypes were described in 799 patients according to the International System for Human Cytogenetic Nomenclature<sup>14</sup>.

### ***Single-nucleotide polymorphism array analysis***

Single-nucleotide polymorphism (SNP) array karyotyping for confirming metaphase cytogenetics and detecting copy-number neutral loss of heterozygosity was performed as previously described<sup>15,16</sup>. Briefly, Affymetrix 250K and 6.0 SNP arrays were used to evaluate copy number and loss of heterozygosity. Using our internal and a publicly available database (<http://dgv.tcag.ca/dgv/app/home>), the screening algorithm validated each lesion as somatic. Non-somatic lesions were excluded from further analysis. Affected genomic positions in each lesion were visualized and extracted using CNAG (v3.0) or Genotyping Console (Affymetrix)<sup>17,18</sup>.

### ***Mutagenesis and constructs***

A plasmid encoding N-terminal FLAG-tagged human SAMD9 with the tetracycline-inducible system was used as described previously<sup>19</sup>. Plasmids encoding five SAMD9 variants (Thr205Pro, Ile247Thr, Ile268Thr, Asp550Val, and Leu574Pro) were generated with a standard site-directed mutagenesis technique with use of wild-type (WT) SAMD9-expressing vector as a template. We also created a vector encoding N-terminal TagRFP-tagged human SAMD9L by inserting the TagRFP sequence (derived from pTagRFP-C [Evrogen, Moscow, Russia]) and human SAMD9L cDNA sequence, and deleting the SAMD9 sequence. Plasmids encoding 9 SAMD9L variants (Leu50Ser, Glu220Gly, Cys228Tyr, Gly235Ser, Gly247Ala, Trp333Cys, Trp517Arg, His880Glu, and Leu1323fs) were generated with a site-directed mutagenesis technique.

### ***Inducible stably transfected HEK293 cells***

HEK293 cells were purchased from the American Type Culture Collection (ATCC CRL-1573). Mycoplasma infection was excluded through the standard indirect DNA staining method. HEK293 cell lines stably expressing each FLAG-SAMD9 and TagRFP-SAMD9L proteins (wild type, mutant, or empty vector) in the presence of doxycycline (1 µg/mL) were established according to the manufacturer's protocol<sup>7,19</sup>. Cells were maintained in DMEM supplemented with 10% FBS in a humidified incubator at 37°C and 5% CO<sub>2</sub>.

### ***Intracellular localization analysis***

Inducible stable HEK293 cells were grown on glass-bottom dishes (Greiner bio-one). Forty-eight hours after induction, cells were fixed and permeabilized by incubation in cold methanol at -20°C for 10 min. Nuclei were stained with Hoechst 33342 (Dojindo). Images were obtained by confocal laser scanning microscopy FV1000D (Olympus).

### **Cell proliferation assays**

For cell growth assays, inducible stable HEK293 cells, were seeded into 96-well plate with about 5% confluence in 200  $\mu$ L of culture medium with or without 1  $\mu$ g/mL doxycycline. The degree of confluence was quantified every 3 hours using an IncuCyte ZOOM time-lapse microscope (Essen BioScience). Growth curve data are representative of three independent assays that were performed in triplicate.

### **Statistical analyses**

Proportions were compared using two-sided Fisher exact tests using R.

### **References**

1. Makishima H, Yoshida K, Nguyen N, et al. Somatic SETBP1 mutations in myeloid malignancies. *Nature Genetics*. 2013;45(8):942-946.
2. Lek M, Karczewski KJ, Minikel EV, et al. Analysis of protein-coding genetic variation in 60,706 humans. *Nature*. 2016;536(7616):285-291.
3. Nazha A, Al-Issa K, Przychodzen B, et al. Differences in genomic patterns and clinical outcomes between African-American and White patients with myelodysplastic syndromes. *Blood Cancer J*. 2017;7(9):e602.
4. Makishima H, Yoshizato T, Yoshida K, et al. Dynamics of clonal evolution in myelodysplastic syndromes. *Nat Genet*. 2017;49(2):204-212.
5. Hirsch CM, Przychodzen BP, Radivoyevitch T, et al. Molecular features of early onset adult myelodysplastic syndrome. *Haematologica*. 2017.
6. Wang K, Li M, Hakonarson H. ANNOVAR: functional annotation of genetic variants from high-throughput sequencing data. *Nucleic Acids Res*. 2010;38(16):e164.
7. Narumi S, Amano N, Ishii T, et al. *SAMD9* mutations cause a novel multisystem disorder, MIRAGE syndrome, and are associated with loss of chromosome 7. *Nat Genet*. 2016;48(7):792-797.
8. Buonocore F, Kühnen P, Suntharalingham JP, et al. Somatic mutations and progressive monosomy modify *SAMD9*-related phenotypes in humans. *J Clin Invest*. 2017.
9. Dong C, Wei P, Jian X, et al. Comparison and integration of deleteriousness prediction methods for nonsynonymous SNVs in whole exome sequencing studies. *Hum Mol Genet*. 2015;24(8):2125-2137.
10. Adzhubei I, Jordan DM, Sunyaev SR. Predicting functional effect of human missense mutations using PolyPhen-2. *Curr Protoc Hum Genet*. 2013;Chapter 7:Unit7.20.
11. Schwarz JM, Rödelsperger C, Schuelke M, Seelow D. MutationTaster evaluates disease-causing potential of sequence alterations. *Nat Methods*. 2010;7(8):575-576.
12. Kumar P, Henikoff S, Ng PC. Predicting the effects of coding non-synonymous variants on protein function using the SIFT algorithm. *Nat Protoc*. 2009;4(7):1073-1081.
13. Choi Y, Sims GE, Murphy S, Miller JR, Chan AP. Predicting the functional effect of amino acid substitutions and indels. *PLoS One*. 2012;7(10):e46688.
14. Gonzalez Garcia JR, Meza-Espinoza JP. Use of the International System for Human Cytogenetic Nomenclature (ISCN). *Blood*. 2006;108(12):3952-3953; author reply 3953.
15. Thota S, Viny AD, Makishima H, et al. Genetic alterations of the cohesin complex genes in myeloid malignancies. *Blood*. 2014;124(11):1790-1798.
16. Nagata Y, Kontani K, Enami T, et al. Variegated *RHOA* mutations in adult T-cell leukemia/lymphoma. *Blood*. 2016;127(5):596-604.

17. Nannya Y, Sanada M, Nakazaki K, et al. A robust algorithm for copy number detection using high-density oligonucleotide single nucleotide polymorphism genotyping arrays. *Cancer Res.* 2005;65(14):6071-6079.
18. Yamamoto G, Nannya Y, Kato M, et al. Highly sensitive method for genomewide detection of allelic composition in nonpaired, primary tumor specimens by use of affymetrix single-nucleotide-polymorphism genotyping microarrays. *Am J Hum Genet.* 2007;81(1):114-126.
19. Shima H, Koehler K, Nomura Y, et al. Two patients with MIRAGE syndrome lacking haematological features: role of somatic second-site reversion *SAMD9* mutations. *J Med Genet.* 2017.

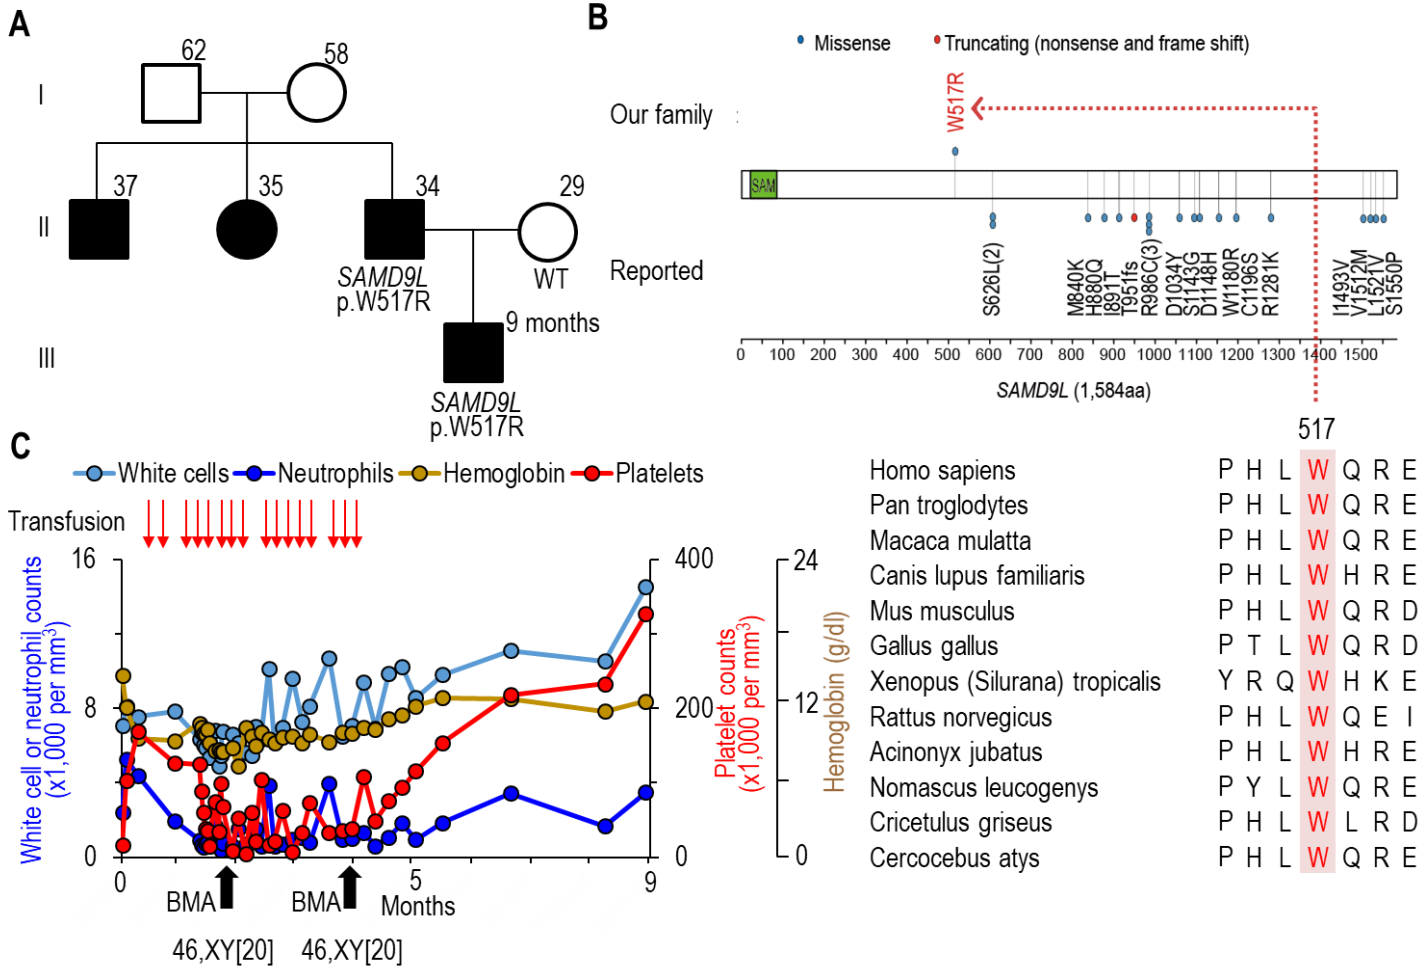

**Supplemental Figure 1. Characteristics of familial thrombocytopenia with SAMD9L variant.**  
 (A) A family tree identifying those with a SAMD9L variant (Trp517Arg) and their thrombocytopenic history (filled: thrombocytopenia; open: confirmed no thrombocytopenia). Ages are on the upper right of pedigree symbols. Paternity was confirmed by whole exome sequencing of patients' and parental germline DNAs. WT denotes wild type. (B) Graphical representation of SAMD9L protein. Functional sterile alpha motif (SAM) is depicted in green. Distribution of germline SAMD9L variants reported in pediatric MDS patients are shown in the lower panel. Amino acid alignment of SAMD9L proteins from different species shows evolutionarily conserved amino acids in red. Position of SAMD9L variants are indicated by a red arrow. (C) Clinical course of the 9-months-old patient with thrombocytopenia, including peripheral-blood counts, platelet transfusion times, and cytogenetics of marrow aspirates. After severe pancytopenia requiring transfusions for four months, this patient's cytopenias resolved spontaneously and he became transfusion-independent.

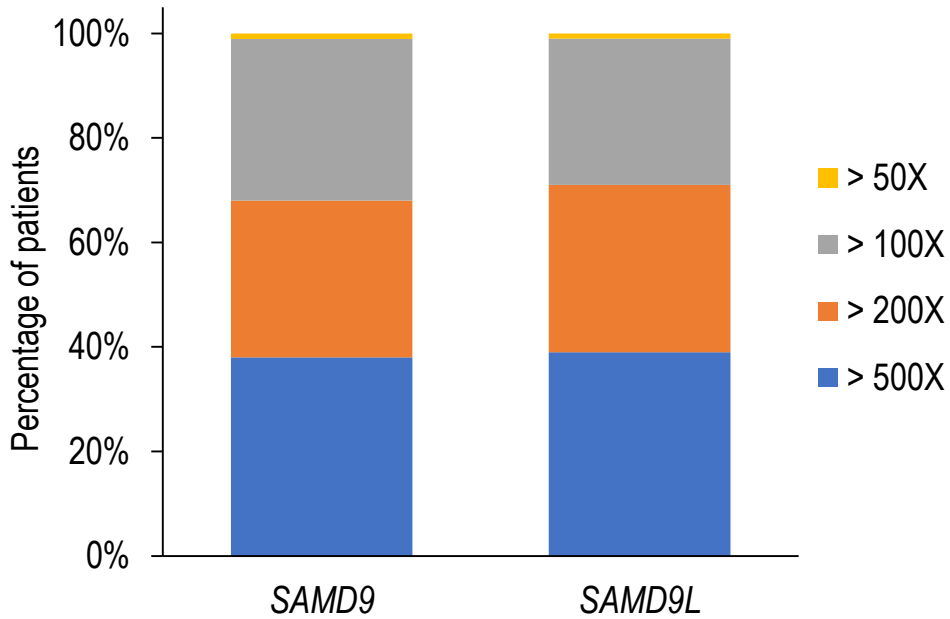

**Supplemental Figure 2. Read coverage for SAMD9 and SAMD9L in targeted capture sequencing.** Shown are the percentages of patients with read coverages of more than 50×, 100×, 200× and 500× for SAMD9 and SAMD9L.

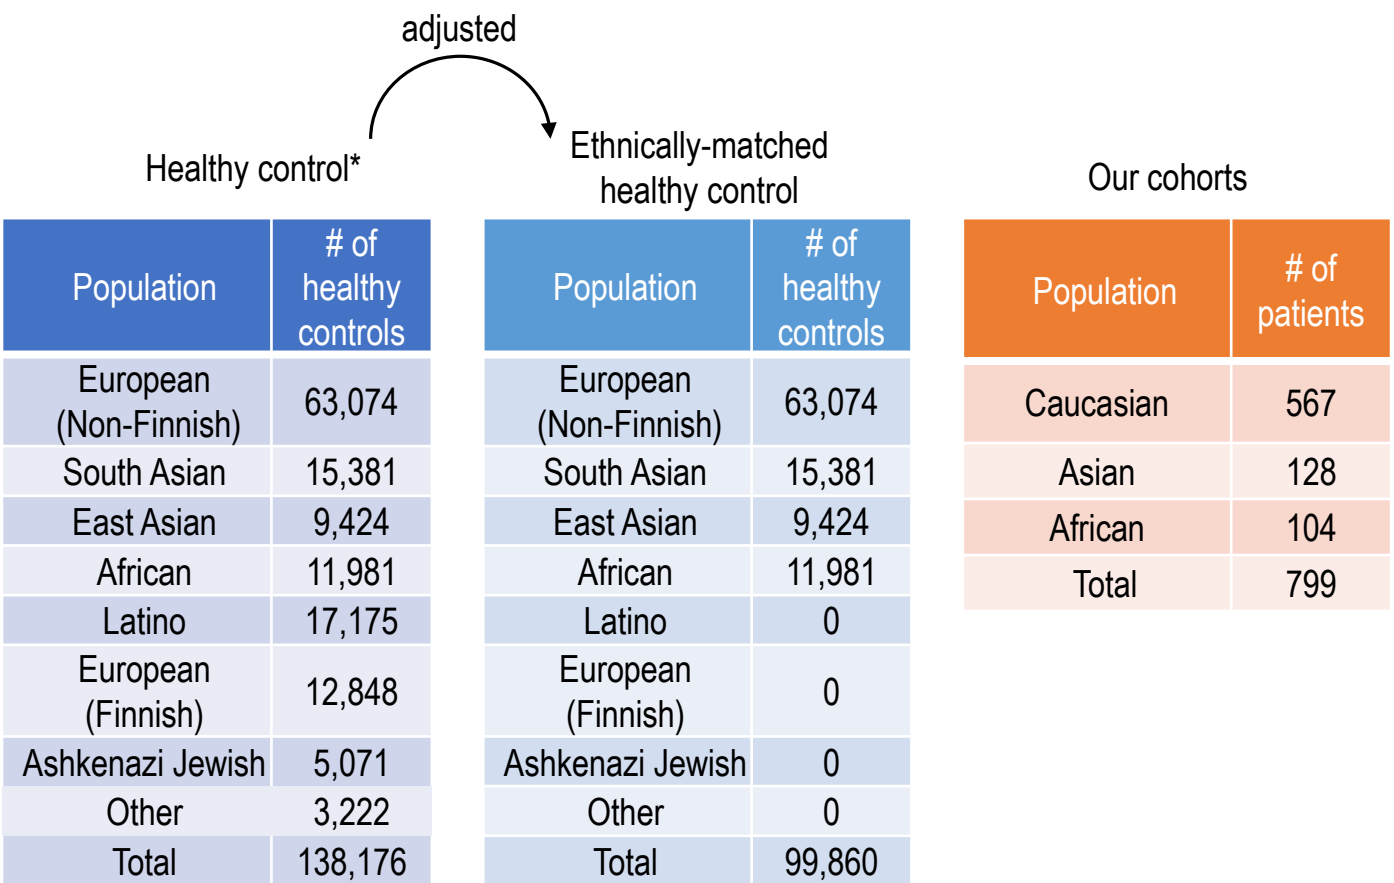

\* *SAMD9/SAMD9L* variants are available in the Genome Aggregation Database (gnomAD)<sup>19,20</sup>.

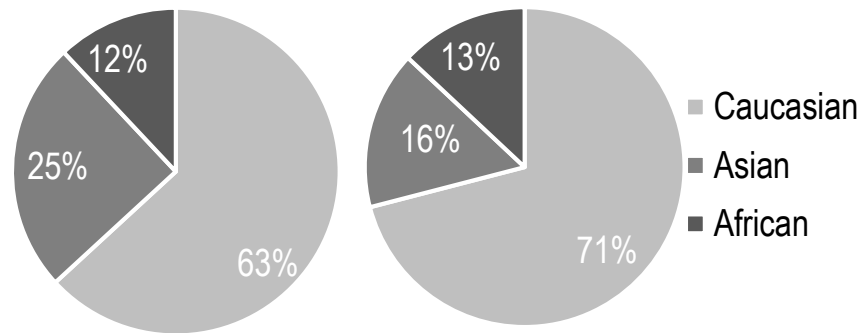

**Supplemental Figure 3. Healthy controls were selected to have ethnicities that matched those of cases in our cohort.**

We used Broad Institute’s Genome Aggregation Database (gnomAD) to obtain ethnicity matched healthy controls (Center table) from a total of 138,176 subjects (Left table); to compare frequencies of germline *SAMD9/SAMD9L* variants in our sporadic adult MDS cohort (Right table) to these controls, ethnicities had to be matched. Thus, Latinos and Finns that were not included in our cohort were omitted, but Caucasians, Asians and African-Americans were included. Fractions of these races are depicted using pie charts.



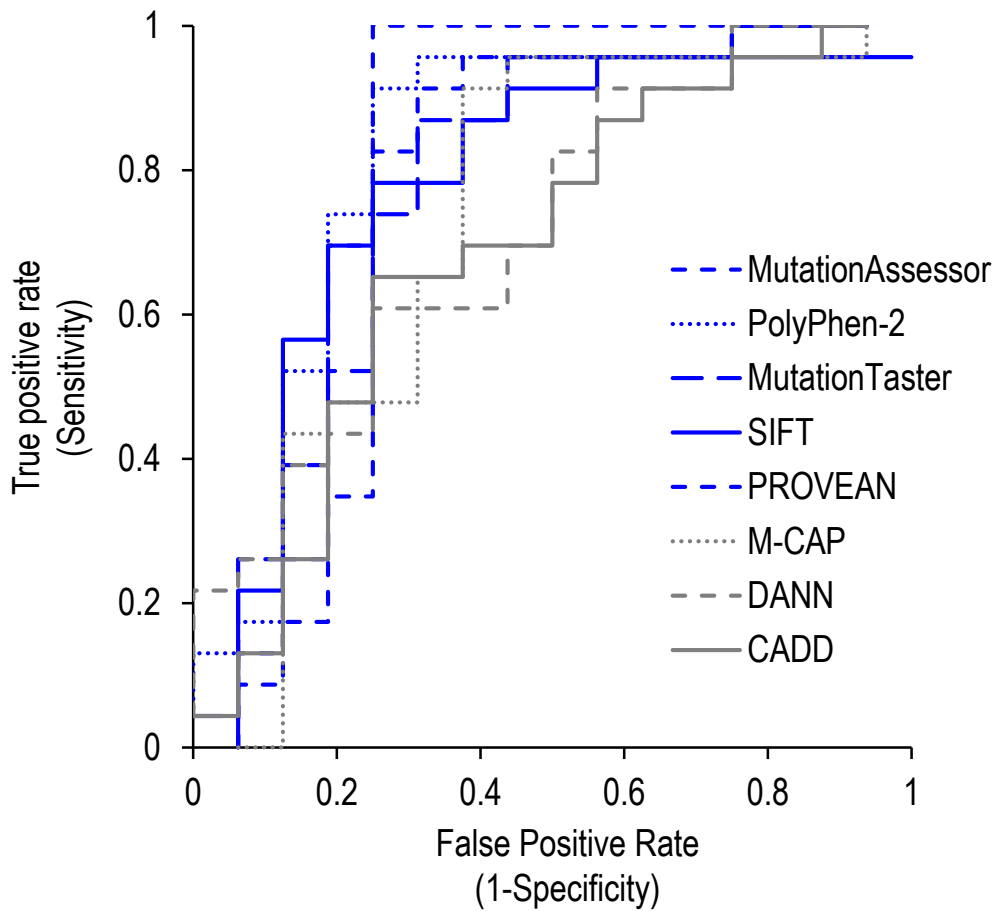

**Supplemental Figure 4. Receiver Operating Characteristic curve for prediction algorithms for missense variants.**

ROC curves of 8 different algorithms were created by using 39 variants which include 23 that were deemed “truly pathogenic” variants by confirming that there was a significant phenotype using a functional assay and by examining familial disease phenotype co-segregations. Blue line graphs depicted the top 5 algorithms in terms of greatest Area Under the Curve.

|                                  |          | The truth                     |                                         |    |
|----------------------------------|----------|-------------------------------|-----------------------------------------|----|
|                                  |          | Has truly pathogenic variants | does not have truly pathogenic variants |    |
| Test result ( $\geq 3$ positive) | Positive | 7                             | 2                                       | 9  |
|                                  | Negative | 16                            | 14                                      | 30 |
|                                  |          | 23                            | 16                                      |    |

### Supplemental Figure 5. Contingency table for prediction of SAMD9 missense variants

We set a strict cut-off (variants with  $\geq 3$  positive scores out of the top 5 algorithms in terms of greatest AUC) to discover missense variants with high possibilities of pathogenesis, even if it reduces the sensitivity. Applying this criteria to 39 variants already confirmed to be pathogenic or not yielded 9 as positive and 7 as truly pathogenic. Given that 23 were truly pathogenic and 16 were not, sensitivity and specificity were 30% ( $7/(7+16)$ ) and 88% ( $14/(14+2)$ ), respectively. Positive predict values and negative predict values were also 78% [ $7/(7+2)$ ] and 47% [ $14/(16+14)$ ].

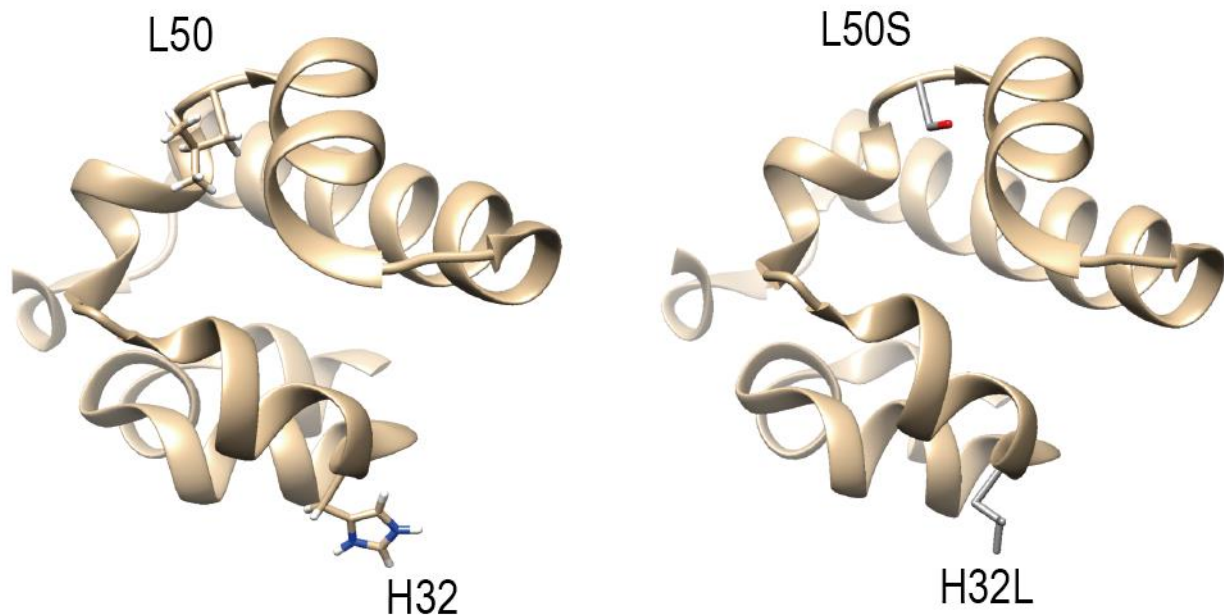

**Supplemental Figure 6. Three-dimensional structure of SAM domain in SAMD9 and SAMD9L**  
Three-dimensional structure of SAM domain were evaluated by the University of California–San Francisco Chimera Program and PDB 2B6G of a protein data bank administered by the RCSB (Research Collaboratory for Structural Bioinformatics). Wild type (Left) and His32Leu and Leu50Ser variants (Right) were shown respectively.

○ Non-induced

● Induced

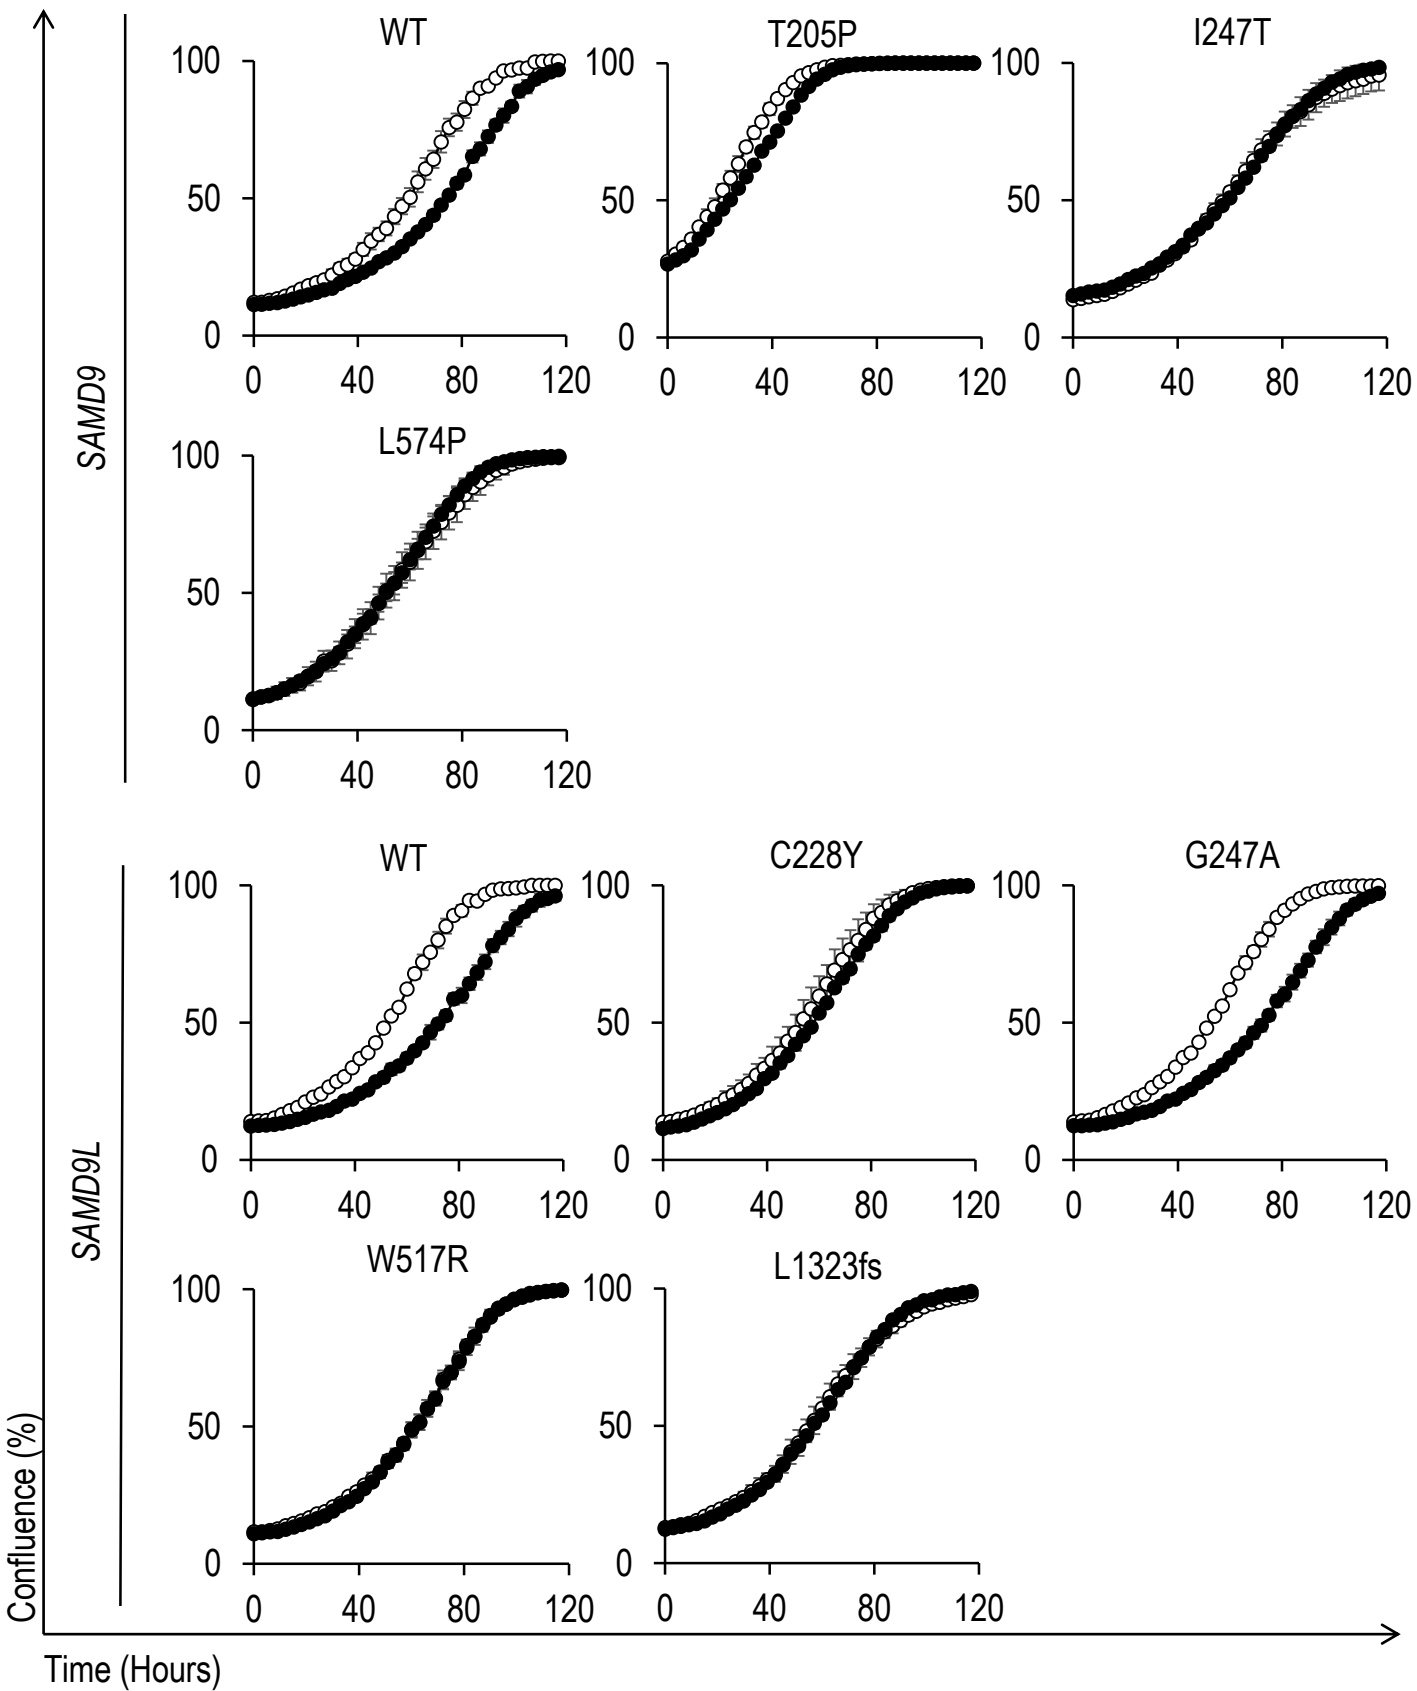

**Supplemental Figure 7. Cell proliferation curves for wild type (WT) or mutants of SAMD9/SAMD9L before and after doxycycline induction**

**Supplementary Table 1. A novel *SAMD9L* variant identified in a family with thrombocytopenia**

|                                    |                                              |
|------------------------------------|----------------------------------------------|
| Chr                                | 7                                            |
| Start                              | 92763736                                     |
| End                                | 92763736                                     |
| Ref                                | A                                            |
| Alt                                | G                                            |
| Function                           | exonic                                       |
| Genes                              | <i>SAMD9L</i>                                |
| ExonicFunc                         | nonsynonymous SNV                            |
| Alterations                        | <i>SAMD9L</i> :NM_001303500:c.T1549C:p.W517R |
| gnomAD frequency ALL               | 0.0003                                       |
| gnomAD frequency AFR               | 0                                            |
| gnomAD frequency AMR               | 2.98E-05                                     |
| gnomAD frequency ASJ               | 0                                            |
| gnomAD frequency EAS               | 0                                            |
| gnomAD frequency FIN               | 4.49E-05                                     |
| gnomAD frequency NFE               | 0.0006                                       |
| gnomAD frequency OTH               | 0                                            |
| gnomAD frequency SAS               | 0                                            |
| avsnp147                           | rs199714577                                  |
| SIFT score                         | 0                                            |
| SIFT converted rankscore           | 0.912                                        |
| SIFT pred                          | D                                            |
| Polyphen2 HDIV score               | 1                                            |
| Polyphen2 HDIV rankscore           | 0.899                                        |
| Polyphen2 HDIV pred                | D                                            |
| Polyphen2 HVAR score               | 0.992                                        |
| Polyphen2 HVAR rankscore           | 0.79                                         |
| Polyphen2 HVAR pred                | D                                            |
| LRT score                          | 0                                            |
| LRT converted rankscore            | 0.629                                        |
| LRT pred                           | D                                            |
| MutationTaster score               | 1                                            |
| MutationTaster converted rankscore | 0.487                                        |
| MutationTaster pred                | D                                            |
| MutationAssessor score             | 2.8                                          |
| MutationAssessor score rankscore   | 0.819                                        |
| MutationAssessor pred              | M                                            |
| FATHMM score                       | 2.15                                         |
| FATHMM converted rankscore         | 0.193                                        |
| FATHMM pred                        | T                                            |
| PROVEAN score                      | -7.18                                        |
| PROVEAN converted rankscore        | 0.942                                        |
| PROVEAN pred                       | D                                            |

Abbreviations; AFR, African; AMR, Latino; EUR, European (Non-Finnish); ASJ, Ashkenazi Jewish; EAS, East Asian; FIN, Finnish; NFE, Non-Finnish European; OTH, Other; SAS, South Asia; FATHMM, Functional Analysis through Hidden Markov Models; PROVEAN, Protein Variation Effect Analyzer

**Supplementary Table 2. Panel of 46 genes for targeted capture sequencing**

|               |              |               |              |
|---------------|--------------|---------------|--------------|
| <i>APC</i>    | <i>ETV6</i>  | <i>NPM1</i>   | <i>SRSF2</i> |
| <i>ASXL1</i>  | <i>EZH2</i>  | <i>NRAS</i>   | <i>STAG2</i> |
| <i>BCOR</i>   | <i>FLT3</i>  | <i>PHF6</i>   | <i>STAT3</i> |
| <i>BCORL1</i> | <i>GATA2</i> | <i>PRPF8</i>  | <i>SUZ12</i> |
| <i>CALR</i>   | <i>IDH1</i>  | <i>PTPN11</i> | <i>TET2</i>  |
| <i>CBL</i>    | <i>IDH2</i>  | <i>RAD21</i>  | <i>TP53</i>  |
| <i>CEBPA</i>  | <i>JAK2</i>  | <i>RUNX1</i>  | <i>U2AF1</i> |
| <i>CSF1R</i>  | <i>JAK3</i>  | <i>SAMD9</i>  | <i>U2AF2</i> |
| <i>CUX1</i>   | <i>KDM6A</i> | <i>SAMD9L</i> | <i>WT1</i>   |
| <i>DDX41</i>  | <i>KIT</i>   | <i>SETBP1</i> | <i>ZRSR2</i> |
| <i>DNMT3A</i> | <i>KRAS</i>  | <i>SF3B1</i>  |              |
| <i>EED</i>    | <i>NF1</i>   | <i>SMC3</i>   |              |

**Supplementary Table 3. Targeted regions for a panel of 46 genes**

| Chromosome | Probes    |           | Gene name     | # of probes |
|------------|-----------|-----------|---------------|-------------|
|            | Start     | End       |               |             |
| chr5       | 112043415 | 112043579 | <i>APC</i>    | 1           |
| chr5       | 112090588 | 112090722 | <i>APC</i>    | 1           |
| chr5       | 112102023 | 112102107 | <i>APC</i>    | 1           |
| chr5       | 112102886 | 112103087 | <i>APC</i>    | 1           |
| chr5       | 112111326 | 112111434 | <i>APC</i>    | 1           |
| chr5       | 112116487 | 112116600 | <i>APC</i>    | 1           |
| chr5       | 112128143 | 112128226 | <i>APC</i>    | 1           |
| chr5       | 112136976 | 112137080 | <i>APC</i>    | 1           |
| chr5       | 112151192 | 112151290 | <i>APC</i>    | 1           |
| chr5       | 112154663 | 112155041 | <i>APC</i>    | 2           |
| chr5       | 112157593 | 112157688 | <i>APC</i>    | 1           |
| chr5       | 112162805 | 112162944 | <i>APC</i>    | 1           |
| chr5       | 112163626 | 112163703 | <i>APC</i>    | 1           |
| chr5       | 112164553 | 112164669 | <i>APC</i>    | 1           |
| chr5       | 112170648 | 112170862 | <i>APC</i>    | 1           |
| chr5       | 112173250 | 112179820 | <i>APC</i>    | 29          |
| chr20      | 30946579  | 30946635  | <i>ASXL1</i>  | 1           |
| chr20      | 30954187  | 30954269  | <i>ASXL1</i>  | 1           |
| chr20      | 30956815  | 30956926  | <i>ASXL1</i>  | 1           |
| chr20      | 30959967  | 30959969  | <i>ASXL1</i>  | 1           |
| chr20      | 31015931  | 31016051  | <i>ASXL1</i>  | 1           |
| chr20      | 31016128  | 31016225  | <i>ASXL1</i>  | 1           |
| chr20      | 31017141  | 31017234  | <i>ASXL1</i>  | 1           |
| chr20      | 31017704  | 31017856  | <i>ASXL1</i>  | 1           |
| chr20      | 31019124  | 31019287  | <i>ASXL1</i>  | 1           |
| chr20      | 31019386  | 31019482  | <i>ASXL1</i>  | 1           |
| chr20      | 31020683  | 31020788  | <i>ASXL1</i>  | 1           |
| chr20      | 31021087  | 31021720  | <i>ASXL1</i>  | 3           |
| chr20      | 31022235  | 31025138  | <i>ASXL1</i>  | 13          |
| chrX       | 39911365  | 39911653  | <i>BCOR</i>   | 2           |
| chrX       | 39913139  | 39913295  | <i>BCOR</i>   | 1           |
| chrX       | 39913509  | 39913586  | <i>BCOR</i>   | 1           |
| chrX       | 39914621  | 39914766  | <i>BCOR</i>   | 1           |
| chrX       | 39916408  | 39916574  | <i>BCOR</i>   | 1           |
| chrX       | 39921392  | 39921646  | <i>BCOR</i>   | 2           |
| chrX       | 39921999  | 39922324  | <i>BCOR</i>   | 2           |
| chrX       | 39922861  | 39923205  | <i>BCOR</i>   | 2           |
| chrX       | 39922861  | 39923103  | <i>BCOR</i>   | 2           |
| chrX       | 39923589  | 39923852  | <i>BCOR</i>   | 2           |
| chrX       | 39930226  | 39930412  | <i>BCOR</i>   | 1           |
| chrX       | 39930890  | 39930943  | <i>BCOR</i>   | 1           |
| chrX       | 39931602  | 39934433  | <i>BCOR</i>   | 13          |
| chrX       | 39935707  | 39935785  | <i>BCOR</i>   | 1           |
| chrX       | 39937097  | 39937182  | <i>BCOR</i>   | 1           |
| chrX       | 129139208 | 129139293 | <i>BCORL1</i> | 1           |
| chrX       | 129146554 | 129146644 | <i>BCORL1</i> | 1           |
| chrX       | 129146926 | 129150189 | <i>BCORL1</i> | 15          |
| chrX       | 129154960 | 129155125 | <i>BCORL1</i> | 1           |

|       |           |           |               |   |
|-------|-----------|-----------|---------------|---|
| chrX  | 129156872 | 129156952 | <i>BCORL1</i> | 1 |
| chrX  | 129158965 | 129159354 | <i>BCORL1</i> | 2 |
| chrX  | 129162610 | 129162836 | <i>BCORL1</i> | 1 |
| chrX  | 129171342 | 129171508 | <i>BCORL1</i> | 1 |
| chrX  | 129173112 | 129173257 | <i>BCORL1</i> | 1 |
| chrX  | 129184692 | 129184769 | <i>BCORL1</i> | 1 |
| chrX  | 129185835 | 129185991 | <i>BCORL1</i> | 1 |
| chrX  | 129189829 | 129190108 | <i>BCORL1</i> | 2 |
| chr19 | 13049494  | 13049584  | <i>CALR</i>   | 1 |
| chr19 | 13049948  | 13050049  | <i>CALR</i>   | 1 |
| chr19 | 13050242  | 13050445  | <i>CALR</i>   | 1 |
| chr19 | 13050867  | 13050961  | <i>CALR</i>   | 1 |
| chr19 | 13051057  | 13051266  | <i>CALR</i>   | 1 |
| chr19 | 13051355  | 13051468  | <i>CALR</i>   | 1 |
| chr19 | 13051558  | 13051701  | <i>CALR</i>   | 1 |
| chr19 | 13054351  | 13054443  | <i>CALR</i>   | 1 |
| chr19 | 13054527  | 13054724  | <i>CALR</i>   | 1 |
| chr11 | 119077128 | 119077322 | <i>CBL</i>    | 1 |
| chr11 | 119103158 | 119103405 | <i>CBL</i>    | 2 |
| chr11 | 119142445 | 119142591 | <i>CBL</i>    | 1 |
| chr11 | 119144578 | 119144734 | <i>CBL</i>    | 1 |
| chr11 | 119145542 | 119145663 | <i>CBL</i>    | 1 |
| chr11 | 119146707 | 119146844 | <i>CBL</i>    | 1 |
| chr11 | 119148467 | 119148554 | <i>CBL</i>    | 1 |
| chr11 | 119148876 | 119149007 | <i>CBL</i>    | 1 |
| chr11 | 119149220 | 119149423 | <i>CBL</i>    | 1 |
| chr11 | 119155679 | 119155810 | <i>CBL</i>    | 1 |
| chr11 | 119155899 | 119156276 | <i>CBL</i>    | 2 |
| chr11 | 119158562 | 119158656 | <i>CBL</i>    | 1 |
| chr11 | 119167628 | 119167744 | <i>CBL</i>    | 1 |
| chr11 | 119168094 | 119168191 | <i>CBL</i>    | 1 |
| chr11 | 119169068 | 119169250 | <i>CBL</i>    | 1 |
| chr11 | 119170205 | 119170488 | <i>CBL</i>    | 2 |
| chr19 | 33792247  | 33793320  | <i>CEBPA</i>  | 5 |
| chr5  | 149433635 | 149433787 | <i>CSF1R</i>  | 1 |
| chr5  | 149433885 | 149433993 | <i>CSF1R</i>  | 1 |
| chr5  | 149434800 | 149434899 | <i>CSF1R</i>  | 1 |
| chr5  | 149435589 | 149435700 | <i>CSF1R</i>  | 1 |
| chr5  | 149435782 | 149435904 | <i>CSF1R</i>  | 1 |
| chr5  | 149436850 | 149436947 | <i>CSF1R</i>  | 1 |
| chr5  | 149437067 | 149437155 | <i>CSF1R</i>  | 1 |
| chr5  | 149439263 | 149439425 | <i>CSF1R</i>  | 1 |
| chr5  | 149440425 | 149440535 | <i>CSF1R</i>  | 1 |
| chr5  | 149441054 | 149441158 | <i>CSF1R</i>  | 1 |
| chr5  | 149441286 | 149441412 | <i>CSF1R</i>  | 1 |
| chr5  | 149447778 | 149447893 | <i>CSF1R</i>  | 1 |
| chr5  | 149449436 | 149449626 | <i>CSF1R</i>  | 1 |
| chr5  | 149449745 | 149449865 | <i>CSF1R</i>  | 1 |
| chr5  | 149450019 | 149450134 | <i>CSF1R</i>  | 1 |
| chr5  | 149452864 | 149453056 | <i>CSF1R</i>  | 1 |
| chr5  | 149456839 | 149456998 | <i>CSF1R</i>  | 1 |
| chr5  | 149457675 | 149457811 | <i>CSF1R</i>  | 1 |



|      |           |           |              |   |
|------|-----------|-----------|--------------|---|
| chr5 | 149459615 | 149459899 | <i>CSF1R</i> | 2 |
| chr5 | 149460330 | 149460587 | <i>CSF1R</i> | 2 |
| chr5 | 149465942 | 149465990 | <i>CSF1R</i> | 1 |
| chr7 | 101459311 | 101459373 | <i>CUX1</i>  | 1 |
| chr7 | 101460920 | 101460949 | <i>CUX1</i>  | 1 |
| chr7 | 101559395 | 101559505 | <i>CUX1</i>  | 1 |
| chr7 | 101671378 | 101671425 | <i>CUX1</i>  | 1 |
| chr7 | 101713619 | 101713697 | <i>CUX1</i>  | 1 |
| chr7 | 101740644 | 101740781 | <i>CUX1</i>  | 1 |
| chr7 | 101747616 | 101747739 | <i>CUX1</i>  | 1 |
| chr7 | 101754978 | 101755054 | <i>CUX1</i>  | 1 |
| chr7 | 101758487 | 101758553 | <i>CUX1</i>  | 1 |
| chr7 | 101801840 | 101801888 | <i>CUX1</i>  | 1 |
| chr7 | 101813726 | 101813830 | <i>CUX1</i>  | 1 |
| chr7 | 101821749 | 101821937 | <i>CUX1</i>  | 1 |
| chr7 | 101821755 | 101821937 | <i>CUX1</i>  | 1 |
| chr7 | 101833093 | 101833151 | <i>CUX1</i>  | 1 |
| chr7 | 101837122 | 101837170 | <i>CUX1</i>  | 1 |
| chr7 | 101838787 | 101838883 | <i>CUX1</i>  | 1 |
| chr7 | 101839914 | 101840585 | <i>CUX1</i>  | 3 |
| chr7 | 101842082 | 101842147 | <i>CUX1</i>  | 1 |
| chr7 | 101843351 | 101843452 | <i>CUX1</i>  | 1 |
| chr7 | 101844640 | 101845484 | <i>CUX1</i>  | 4 |
| chr7 | 101847671 | 101847836 | <i>CUX1</i>  | 1 |
| chr7 | 101848394 | 101848450 | <i>CUX1</i>  | 1 |
| chr7 | 101870647 | 101870949 | <i>CUX1</i>  | 2 |
| chr7 | 101877332 | 101877520 | <i>CUX1</i>  | 1 |
| chr7 | 101882600 | 101882864 | <i>CUX1</i>  | 2 |
| chr7 | 101891692 | 101892319 | <i>CUX1</i>  | 3 |
| chr7 | 101916637 | 101916764 | <i>CUX1</i>  | 1 |
| chr7 | 101917515 | 101917581 | <i>CUX1</i>  | 1 |
| chr7 | 101918518 | 101918630 | <i>CUX1</i>  | 1 |
| chr7 | 101921220 | 101921336 | <i>CUX1</i>  | 1 |
| chr7 | 101923329 | 101923412 | <i>CUX1</i>  | 1 |
| chr7 | 101924096 | 101924152 | <i>CUX1</i>  | 1 |
| chr7 | 101925132 | 101925212 | <i>CUX1</i>  | 1 |
| chr7 | 101926004 | 101926068 | <i>CUX1</i>  | 1 |
| chr7 | 101926313 | 101926379 | <i>CUX1</i>  | 1 |
| chr5 | 176938795 | 176938928 | <i>DDX41</i> | 1 |
| chr5 | 176939097 | 176939207 | <i>DDX41</i> | 1 |
| chr5 | 176939323 | 176939394 | <i>DDX41</i> | 1 |
| chr5 | 176939497 | 176939646 | <i>DDX41</i> | 1 |
| chr5 | 176939781 | 176939877 | <i>DDX41</i> | 1 |
| chr5 | 176940012 | 176940083 | <i>DDX41</i> | 1 |
| chr5 | 176940354 | 176940485 | <i>DDX41</i> | 1 |
| chr5 | 176940686 | 176940848 | <i>DDX41</i> | 1 |
| chr5 | 176941702 | 176941838 | <i>DDX41</i> | 1 |
| chr5 | 176941917 | 176942070 | <i>DDX41</i> | 1 |
| chr5 | 176942187 | 176942259 | <i>DDX41</i> | 1 |
| chr5 | 176942686 | 176942822 | <i>DDX41</i> | 1 |
| chr5 | 176942930 | 176942990 | <i>DDX41</i> | 1 |
| chr5 | 176943120 | 176943194 | <i>DDX41</i> | 1 |

|       |           |           |               |   |
|-------|-----------|-----------|---------------|---|
| chr5  | 176943289 | 176943448 | <i>DDX41</i>  | 1 |
| chr5  | 176943726 | 176943836 | <i>DDX41</i>  | 1 |
| chr5  | 176943920 | 176943946 | <i>DDX41</i>  | 1 |
| chr2  | 25457151  | 25457289  | <i>DNMT3A</i> | 1 |
| chr2  | 25458576  | 25458694  | <i>DNMT3A</i> | 1 |
| chr2  | 25459805  | 25459874  | <i>DNMT3A</i> | 1 |
| chr2  | 25461999  | 25462084  | <i>DNMT3A</i> | 1 |
| chr2  | 25463171  | 25463319  | <i>DNMT3A</i> | 1 |
| chr2  | 25463509  | 25463599  | <i>DNMT3A</i> | 1 |
| chr2  | 25464431  | 25464576  | <i>DNMT3A</i> | 1 |
| chr2  | 25466767  | 25466851  | <i>DNMT3A</i> | 1 |
| chr2  | 25467024  | 25467207  | <i>DNMT3A</i> | 1 |
| chr2  | 25467409  | 25467521  | <i>DNMT3A</i> | 1 |
| chr2  | 25468122  | 25468201  | <i>DNMT3A</i> | 1 |
| chr2  | 25468889  | 25468933  | <i>DNMT3A</i> | 1 |
| chr2  | 25469029  | 25469178  | <i>DNMT3A</i> | 1 |
| chr2  | 25469489  | 25469645  | <i>DNMT3A</i> | 1 |
| chr2  | 25469920  | 25470027  | <i>DNMT3A</i> | 1 |
| chr2  | 25470460  | 25470618  | <i>DNMT3A</i> | 1 |
| chr2  | 25470906  | 25471121  | <i>DNMT3A</i> | 1 |
| chr2  | 25472526  | 25472593  | <i>DNMT3A</i> | 1 |
| chr2  | 25475063  | 25475066  | <i>DNMT3A</i> | 1 |
| chr2  | 25497810  | 25497956  | <i>DNMT3A</i> | 1 |
| chr2  | 25498369  | 25498412  | <i>DNMT3A</i> | 1 |
| chr2  | 25505260  | 25505580  | <i>DNMT3A</i> | 2 |
| chr2  | 25505310  | 25505580  | <i>DNMT3A</i> | 2 |
| chr2  | 25523008  | 25523112  | <i>DNMT3A</i> | 1 |
| chr2  | 25536782  | 25536853  | <i>DNMT3A</i> | 1 |
| chr11 | 85956272  | 85956385  | <i>EED</i>    | 1 |
| chr11 | 85961338  | 85961490  | <i>EED</i>    | 1 |
| chr11 | 85963190  | 85963282  | <i>EED</i>    | 1 |
| chr11 | 85966264  | 85966329  | <i>EED</i>    | 1 |
| chr11 | 85967429  | 85967554  | <i>EED</i>    | 1 |
| chr11 | 85968557  | 85968638  | <i>EED</i>    | 1 |
| chr11 | 85975214  | 85975305  | <i>EED</i>    | 1 |
| chr11 | 85977125  | 85977258  | <i>EED</i>    | 1 |
| chr11 | 85979498  | 85979603  | <i>EED</i>    | 1 |
| chr11 | 85988022  | 85988180  | <i>EED</i>    | 1 |
| chr11 | 85988960  | 85989033  | <i>EED</i>    | 1 |
| chr11 | 85988960  | 85989034  | <i>EED</i>    | 1 |
| chr11 | 85989441  | 85989564  | <i>EED</i>    | 1 |
| chr12 | 11803062  | 11803094  | <i>ETV6</i>   | 1 |
| chr12 | 11905384  | 11905513  | <i>ETV6</i>   | 1 |
| chr12 | 11992074  | 11992238  | <i>ETV6</i>   | 1 |
| chr12 | 12006361  | 12006495  | <i>ETV6</i>   | 1 |
| chr12 | 12022358  | 12022903  | <i>ETV6</i>   | 3 |
| chr12 | 12037379  | 12037521  | <i>ETV6</i>   | 1 |
| chr12 | 12038860  | 12038960  | <i>ETV6</i>   | 1 |
| chr12 | 12043875  | 12043977  | <i>ETV6</i>   | 1 |
| chr7  | 148504741 | 148504798 | <i>EZH2</i>   | 1 |
| chr7  | 148506163 | 148506247 | <i>EZH2</i>   | 1 |
| chr7  | 148506402 | 148506482 | <i>EZH2</i>   | 1 |

|       |           |           |              |   |
|-------|-----------|-----------|--------------|---|
| chr7  | 148507425 | 148507506 | <i>EZH2</i>  | 1 |
| chr7  | 148508717 | 148508812 | <i>EZH2</i>  | 1 |
| chr7  | 148511051 | 148511229 | <i>EZH2</i>  | 1 |
| chr7  | 148512006 | 148512131 | <i>EZH2</i>  | 1 |
| chr7  | 148512598 | 148512638 | <i>EZH2</i>  | 1 |
| chr7  | 148513776 | 148513870 | <i>EZH2</i>  | 1 |
| chr7  | 148514314 | 148514483 | <i>EZH2</i>  | 1 |
| chr7  | 148514969 | 148515209 | <i>EZH2</i>  | 2 |
| chr7  | 148516688 | 148516779 | <i>EZH2</i>  | 1 |
| chr7  | 148523546 | 148523724 | <i>EZH2</i>  | 1 |
| chr7  | 148523561 | 148523724 | <i>EZH2</i>  | 1 |
| chr7  | 148524256 | 148524358 | <i>EZH2</i>  | 1 |
| chr7  | 148525832 | 148525972 | <i>EZH2</i>  | 1 |
| chr7  | 148526820 | 148526940 | <i>EZH2</i>  | 1 |
| chr7  | 148529726 | 148529842 | <i>EZH2</i>  | 1 |
| chr7  | 148543562 | 148543690 | <i>EZH2</i>  | 1 |
| chr7  | 148543589 | 148543690 | <i>EZH2</i>  | 1 |
| chr7  | 148544274 | 148544390 | <i>EZH2</i>  | 1 |
| chr13 | 28578192  | 28578311  | <i>FLT3</i>  | 1 |
| chr13 | 28588589  | 28588694  | <i>FLT3</i>  | 1 |
| chr13 | 28589294  | 28589393  | <i>FLT3</i>  | 1 |
| chr13 | 28589727  | 28589838  | <i>FLT3</i>  | 1 |
| chr13 | 28592604  | 28592726  | <i>FLT3</i>  | 1 |
| chr13 | 28597487  | 28597614  | <i>FLT3</i>  | 1 |
| chr13 | 28598998  | 28599080  | <i>FLT3</i>  | 1 |
| chr13 | 28601225  | 28601378  | <i>FLT3</i>  | 1 |
| chr13 | 28602315  | 28602425  | <i>FLT3</i>  | 1 |
| chr13 | 28608024  | 28608128  | <i>FLT3</i>  | 1 |
| chr13 | 28608219  | 28608351  | <i>FLT3</i>  | 1 |
| chr13 | 28608438  | 28608544  | <i>FLT3</i>  | 1 |
| chr13 | 28609632  | 28609810  | <i>FLT3</i>  | 1 |
| chr13 | 28610072  | 28610180  | <i>FLT3</i>  | 1 |
| chr13 | 28611322  | 28611425  | <i>FLT3</i>  | 1 |
| chr13 | 28622412  | 28622580  | <i>FLT3</i>  | 1 |
| chr13 | 28623521  | 28623674  | <i>FLT3</i>  | 1 |
| chr13 | 28623772  | 28623911  | <i>FLT3</i>  | 1 |
| chr13 | 28624232  | 28624359  | <i>FLT3</i>  | 1 |
| chr13 | 28626682  | 28626811  | <i>FLT3</i>  | 1 |
| chr13 | 28631484  | 28631599  | <i>FLT3</i>  | 1 |
| chr13 | 28636004  | 28636206  | <i>FLT3</i>  | 1 |
| chr13 | 28644628  | 28644749  | <i>FLT3</i>  | 1 |
| chr13 | 28674605  | 28674647  | <i>FLT3</i>  | 1 |
| chr3  | 128199865 | 128200161 | <i>GATA2</i> | 2 |
| chr3  | 128200662 | 128200745 | <i>GATA2</i> | 1 |
| chr3  | 128200662 | 128200787 | <i>GATA2</i> | 1 |
| chr3  | 128202703 | 128202848 | <i>GATA2</i> | 1 |
| chr3  | 128204570 | 128205211 | <i>GATA2</i> | 3 |
| chr3  | 128205646 | 128205874 | <i>GATA2</i> | 1 |
| chr2  | 209101806 | 209101893 | <i>IDH1</i>  | 1 |
| chr2  | 209103795 | 209103957 | <i>IDH1</i>  | 1 |
| chr2  | 209104587 | 209104727 | <i>IDH1</i>  | 1 |
| chr2  | 209106718 | 209106869 | <i>IDH1</i>  | 1 |

|       |           |           |      |   |
|-------|-----------|-----------|------|---|
| chr2  | 209108151 | 209108328 | IDH1 | 1 |
| chr2  | 209110043 | 209110148 | IDH1 | 1 |
| chr2  | 209113093 | 209113384 | IDH1 | 2 |
| chr2  | 209116154 | 209116275 | IDH1 | 1 |
| chr15 | 90627501  | 90627585  | IDH2 | 1 |
| chr15 | 90628048  | 90628140  | IDH2 | 1 |
| chr15 | 90628233  | 90628330  | IDH2 | 1 |
| chr15 | 90628507  | 90628619  | IDH2 | 1 |
| chr15 | 90630344  | 90630495  | IDH2 | 1 |
| chr15 | 90630671  | 90630807  | IDH2 | 1 |
| chr15 | 90631591  | 90631734  | IDH2 | 1 |
| chr15 | 90631819  | 90631979  | IDH2 | 1 |
| chr15 | 90633711  | 90633876  | IDH2 | 1 |
| chr15 | 90634785  | 90634876  | IDH2 | 1 |
| chr15 | 90645508  | 90645622  | IDH2 | 1 |
| chr9  | 5021988   | 5022213   | JAK2 | 1 |
| chr9  | 5029783   | 5029906   | JAK2 | 1 |
| chr9  | 5044403   | 5044520   | JAK2 | 1 |
| chr9  | 5050686   | 5050831   | JAK2 | 1 |
| chr9  | 5054563   | 5054884   | JAK2 | 2 |
| chr9  | 5055669   | 5055788   | JAK2 | 1 |
| chr9  | 5064883   | 5065040   | JAK2 | 1 |
| chr9  | 5066678   | 5066789   | JAK2 | 1 |
| chr9  | 5069022   | 5069208   | JAK2 | 1 |
| chr9  | 5069925   | 5070052   | JAK2 | 1 |
| chr9  | 5072492   | 5072626   | JAK2 | 1 |
| chr9  | 5073698   | 5073785   | JAK2 | 1 |
| chr9  | 5077453   | 5077580   | JAK2 | 1 |
| chr9  | 5078306   | 5078444   | JAK2 | 1 |
| chr9  | 5080229   | 5080380   | JAK2 | 1 |
| chr9  | 5080533   | 5080683   | JAK2 | 1 |
| chr9  | 5081725   | 5081861   | JAK2 | 1 |
| chr9  | 5089674   | 5089863   | JAK2 | 1 |
| chr9  | 5090446   | 5090570   | JAK2 | 1 |
| chr9  | 5090739   | 5090911   | JAK2 | 1 |
| chr9  | 5123004   | 5123121   | JAK2 | 1 |
| chr9  | 5126333   | 5126446   | JAK2 | 1 |
| chr9  | 5126684   | 5126788   | JAK2 | 1 |
| chr19 | 17937555  | 17937719  | JAK3 | 1 |
| chr19 | 17940917  | 17941027  | JAK3 | 1 |
| chr19 | 17941312  | 17941429  | JAK3 | 1 |
| chr19 | 17942037  | 17942209  | JAK3 | 1 |
| chr19 | 17942483  | 17942607  | JAK3 | 1 |
| chr19 | 17943328  | 17943517  | JAK3 | 1 |
| chr19 | 17943599  | 17943738  | JAK3 | 1 |
| chr19 | 17945380  | 17945530  | JAK3 | 1 |
| chr19 | 17945661  | 17945812  | JAK3 | 1 |
| chr19 | 17945892  | 17946024  | JAK3 | 1 |
| chr19 | 17946733  | 17946860  | JAK3 | 1 |
| chr19 | 17947938  | 17948022  | JAK3 | 1 |
| chr19 | 17948741  | 17948872  | JAK3 | 1 |
| chr19 | 17949072  | 17949199  | JAK3 | 1 |

|       |          |          |       |   |
|-------|----------|----------|-------|---|
| chr19 | 17950286 | 17950472 | JAK3  | 1 |
| chr19 | 17951039 | 17951150 | JAK3  | 1 |
| chr19 | 17952198 | 17952355 | JAK3  | 1 |
| chr19 | 17952449 | 17952571 | JAK3  | 1 |
| chr19 | 17953125 | 17953419 | JAK3  | 2 |
| chr19 | 17953836 | 17953981 | JAK3  | 1 |
| chr19 | 17954189 | 17954300 | JAK3  | 1 |
| chr19 | 17954586 | 17954709 | JAK3  | 1 |
| chr19 | 17955043 | 17955226 | JAK3  | 1 |
| chrX  | 44732798 | 44732958 | KDM6A | 1 |
| chrX  | 44733170 | 44733233 | KDM6A | 1 |
| chrX  | 44820529 | 44820637 | KDM6A | 1 |
| chrX  | 44833911 | 44833960 | KDM6A | 1 |
| chrX  | 44870206 | 44870264 | KDM6A | 1 |
| chrX  | 44879855 | 44879975 | KDM6A | 1 |
| chrX  | 44894176 | 44894230 | KDM6A | 1 |
| chrX  | 44896900 | 44896934 | KDM6A | 1 |
| chrX  | 44910954 | 44911047 | KDM6A | 1 |
| chrX  | 44913074 | 44913200 | KDM6A | 1 |
| chrX  | 44918251 | 44918349 | KDM6A | 1 |
| chrX  | 44918492 | 44918711 | KDM6A | 1 |
| chrX  | 44919267 | 44919401 | KDM6A | 1 |
| chrX  | 44920569 | 44920664 | KDM6A | 1 |
| chrX  | 44921892 | 44921993 | KDM6A | 1 |
| chrX  | 44922667 | 44923062 | KDM6A | 2 |
| chrX  | 44928824 | 44929602 | KDM6A | 4 |
| chrX  | 44935942 | 44936071 | KDM6A | 1 |
| chrX  | 44937645 | 44937750 | KDM6A | 1 |
| chrX  | 44938391 | 44938596 | KDM6A | 1 |
| chrX  | 44941821 | 44941885 | KDM6A | 1 |
| chrX  | 44941960 | 44942034 | KDM6A | 1 |
| chrX  | 44942705 | 44942853 | KDM6A | 1 |
| chrX  | 44945110 | 44945224 | KDM6A | 1 |
| chrX  | 44948988 | 44949175 | KDM6A | 1 |
| chrX  | 44949968 | 44950109 | KDM6A | 1 |
| chrX  | 44966655 | 44966781 | KDM6A | 1 |
| chrX  | 44969324 | 44969494 | KDM6A | 1 |
| chrX  | 44970627 | 44970653 | KDM6A | 1 |
| chr4  | 55524182 | 55524248 | KIT   | 1 |
| chr4  | 55561678 | 55561947 | KIT   | 2 |
| chr4  | 55564450 | 55564731 | KIT   | 2 |
| chr4  | 55565796 | 55565932 | KIT   | 1 |
| chr4  | 55569890 | 55570058 | KIT   | 1 |
| chr4  | 55573264 | 55573453 | KIT   | 1 |
| chr4  | 55575590 | 55575705 | KIT   | 1 |
| chr4  | 55589750 | 55589864 | KIT   | 1 |
| chr4  | 55592023 | 55592204 | KIT   | 1 |
| chr4  | 55592023 | 55592216 | KIT   | 1 |
| chr4  | 55593384 | 55593490 | KIT   | 1 |
| chr4  | 55593582 | 55593708 | KIT   | 1 |
| chr4  | 55593989 | 55594093 | KIT   | 1 |
| chr4  | 55594177 | 55594287 | KIT   | 1 |

|       |          |          |             |   |
|-------|----------|----------|-------------|---|
| chr4  | 55595501 | 55595651 | <i>KIT</i>  | 1 |
| chr4  | 55597494 | 55597585 | <i>KIT</i>  | 1 |
| chr4  | 55598037 | 55598164 | <i>KIT</i>  | 1 |
| chr4  | 55599236 | 55599358 | <i>KIT</i>  | 1 |
| chr4  | 55602664 | 55602775 | <i>KIT</i>  | 1 |
| chr4  | 55602887 | 55602986 | <i>KIT</i>  | 1 |
| chr4  | 55603341 | 55603446 | <i>KIT</i>  | 1 |
| chr4  | 55604595 | 55604720 | <i>KIT</i>  | 1 |
| chr12 | 25362732 | 25362845 | <i>KRAS</i> | 1 |
| chr12 | 25368378 | 25368494 | <i>KRAS</i> | 1 |
| chr12 | 25378548 | 25378707 | <i>KRAS</i> | 1 |
| chr12 | 25380168 | 25380346 | <i>KRAS</i> | 1 |
| chr12 | 25398208 | 25398318 | <i>KRAS</i> | 1 |
| chr17 | 29422328 | 29422387 | <i>NF1</i>  | 1 |
| chr17 | 29483001 | 29483144 | <i>NF1</i>  | 1 |
| chr17 | 29486028 | 29486111 | <i>NF1</i>  | 1 |
| chr17 | 29490204 | 29490394 | <i>NF1</i>  | 1 |
| chr17 | 29496909 | 29497015 | <i>NF1</i>  | 1 |
| chr17 | 29508440 | 29508507 | <i>NF1</i>  | 1 |
| chr17 | 29508728 | 29508803 | <i>NF1</i>  | 1 |
| chr17 | 29509526 | 29509683 | <i>NF1</i>  | 1 |
| chr17 | 29527440 | 29527613 | <i>NF1</i>  | 1 |
| chr17 | 29528055 | 29528177 | <i>NF1</i>  | 1 |
| chr17 | 29528429 | 29528503 | <i>NF1</i>  | 1 |
| chr17 | 29533258 | 29533389 | <i>NF1</i>  | 1 |
| chr17 | 29541469 | 29541603 | <i>NF1</i>  | 1 |
| chr17 | 29546023 | 29546136 | <i>NF1</i>  | 1 |
| chr17 | 29548868 | 29549005 | <i>NF1</i>  | 1 |
| chr17 | 29548868 | 29548947 | <i>NF1</i>  | 1 |
| chr17 | 29550462 | 29550585 | <i>NF1</i>  | 1 |
| chr17 | 29552113 | 29552268 | <i>NF1</i>  | 1 |
| chr17 | 29553453 | 29553702 | <i>NF1</i>  | 2 |
| chr17 | 29554236 | 29554309 | <i>NF1</i>  | 1 |
| chr17 | 29554541 | 29554624 | <i>NF1</i>  | 1 |
| chr17 | 29556043 | 29556483 | <i>NF1</i>  | 2 |
| chr17 | 29556853 | 29556992 | <i>NF1</i>  | 1 |
| chr17 | 29557278 | 29557400 | <i>NF1</i>  | 1 |
| chr17 | 29557860 | 29557943 | <i>NF1</i>  | 1 |
| chr17 | 29559091 | 29559207 | <i>NF1</i>  | 1 |
| chr17 | 29559718 | 29559899 | <i>NF1</i>  | 1 |
| chr17 | 29560020 | 29560231 | <i>NF1</i>  | 1 |
| chr17 | 29562629 | 29562790 | <i>NF1</i>  | 1 |
| chr17 | 29562936 | 29563039 | <i>NF1</i>  | 1 |
| chr17 | 29576002 | 29576137 | <i>NF1</i>  | 1 |
| chr17 | 29579956 | 29580018 | <i>NF1</i>  | 1 |
| chr17 | 29585362 | 29585520 | <i>NF1</i>  | 1 |
| chr17 | 29586050 | 29586147 | <i>NF1</i>  | 1 |
| chr17 | 29587387 | 29587533 | <i>NF1</i>  | 1 |
| chr17 | 29588729 | 29588875 | <i>NF1</i>  | 1 |
| chr17 | 29592247 | 29592357 | <i>NF1</i>  | 1 |
| chr17 | 29652838 | 29653270 | <i>NF1</i>  | 2 |
| chr17 | 29654517 | 29654857 | <i>NF1</i>  | 2 |

|       |           |           |       |   |
|-------|-----------|-----------|-------|---|
| chr17 | 29657314  | 29657516  | NF1   | 1 |
| chr17 | 29661856  | 29662049  | NF1   | 1 |
| chr17 | 29663351  | 29663491  | NF1   | 1 |
| chr17 | 29663653  | 29663932  | NF1   | 2 |
| chr17 | 29664386  | 29664600  | NF1   | 1 |
| chr17 | 29664837  | 29664898  | NF1   | 1 |
| chr17 | 29665043  | 29665157  | NF1   | 1 |
| chr17 | 29665722  | 29665823  | NF1   | 1 |
| chr17 | 29667523  | 29667663  | NF1   | 1 |
| chr17 | 29670027  | 29670153  | NF1   | 1 |
| chr17 | 29676138  | 29676269  | NF1   | 1 |
| chr17 | 29677201  | 29677336  | NF1   | 1 |
| chr17 | 29679275  | 29679432  | NF1   | 1 |
| chr17 | 29683478  | 29683600  | NF1   | 1 |
| chr17 | 29683978  | 29684108  | NF1   | 1 |
| chr17 | 29684287  | 29684387  | NF1   | 1 |
| chr17 | 29685498  | 29685640  | NF1   | 1 |
| chr17 | 29685987  | 29686033  | NF1   | 1 |
| chr17 | 29687505  | 29687721  | NF1   | 1 |
| chr17 | 29701031  | 29701170  | NF1   | 1 |
| chr5  | 170814953 | 170815010 | NPM1  | 1 |
| chr5  | 170817055 | 170817134 | NPM1  | 1 |
| chr5  | 170818309 | 170818428 | NPM1  | 1 |
| chr5  | 170818710 | 170818803 | NPM1  | 1 |
| chr5  | 170819714 | 170819820 | NPM1  | 1 |
| chr5  | 170819918 | 170819982 | NPM1  | 1 |
| chr5  | 170827157 | 170827214 | NPM1  | 1 |
| chr5  | 170827843 | 170827929 | NPM1  | 1 |
| chr5  | 170832306 | 170832407 | NPM1  | 1 |
| chr5  | 170833401 | 170833406 | NPM1  | 1 |
| chr5  | 170834704 | 170834778 | NPM1  | 1 |
| chr5  | 170837531 | 170837566 | NPM1  | 1 |
| chr1  | 115251159 | 115251275 | NRAS  | 1 |
| chr1  | 115252190 | 115252349 | NRAS  | 1 |
| chr1  | 115256421 | 115256599 | NRAS  | 1 |
| chr1  | 115258671 | 115258781 | NRAS  | 1 |
| chrX  | 133511648 | 133511785 | PHF6  | 1 |
| chrX  | 133512035 | 133512136 | PHF6  | 1 |
| chrX  | 133527531 | 133527664 | PHF6  | 1 |
| chrX  | 133527939 | 133527982 | PHF6  | 1 |
| chrX  | 133547518 | 133547687 | PHF6  | 1 |
| chrX  | 133547521 | 133547687 | PHF6  | 1 |
| chrX  | 133547853 | 133547996 | PHF6  | 1 |
| chrX  | 133549046 | 133549150 | PHF6  | 1 |
| chrX  | 133549046 | 133549249 | PHF6  | 1 |
| chrX  | 133551199 | 133551332 | PHF6  | 1 |
| chrX  | 133559231 | 133559357 | PHF6  | 1 |
| chr17 | 1554099   | 1554250   | PRPF8 | 1 |
| chr17 | 1554402   | 1554604   | PRPF8 | 1 |
| chr17 | 1554708   | 1554847   | PRPF8 | 1 |
| chr17 | 1554942   | 1555082   | PRPF8 | 1 |
| chr17 | 1556836   | 1556977   | PRPF8 | 1 |

|       |           |           |        |   |
|-------|-----------|-----------|--------|---|
| chr17 | 1557071   | 1557310   | PRPF8  | 2 |
| chr17 | 1558644   | 1558837   | PRPF8  | 1 |
| chr17 | 1559686   | 1559859   | PRPF8  | 1 |
| chr17 | 1559942   | 1560055   | PRPF8  | 1 |
| chr17 | 1561547   | 1561675   | PRPF8  | 1 |
| chr17 | 1561820   | 1562057   | PRPF8  | 2 |
| chr17 | 1562651   | 1562842   | PRPF8  | 1 |
| chr17 | 1563135   | 1563295   | PRPF8  | 1 |
| chr17 | 1563726   | 1563872   | PRPF8  | 1 |
| chr17 | 1563992   | 1564121   | PRPF8  | 1 |
| chr17 | 1564287   | 1564456   | PRPF8  | 1 |
| chr17 | 1564565   | 1564700   | PRPF8  | 1 |
| chr17 | 1564905   | 1565084   | PRPF8  | 1 |
| chr17 | 1565200   | 1565447   | PRPF8  | 2 |
| chr17 | 1576375   | 1576491   | PRPF8  | 1 |
| chr17 | 1576651   | 1576861   | PRPF8  | 1 |
| chr17 | 1577040   | 1577186   | PRPF8  | 1 |
| chr17 | 1577736   | 1577974   | PRPF8  | 2 |
| chr17 | 1578446   | 1578633   | PRPF8  | 1 |
| chr17 | 1578914   | 1579106   | PRPF8  | 1 |
| chr17 | 1579222   | 1579348   | PRPF8  | 1 |
| chr17 | 1579501   | 1579664   | PRPF8  | 1 |
| chr17 | 1579799   | 1580005   | PRPF8  | 1 |
| chr17 | 1580270   | 1580466   | PRPF8  | 1 |
| chr17 | 1580859   | 1580988   | PRPF8  | 1 |
| chr17 | 1581812   | 1581946   | PRPF8  | 1 |
| chr17 | 1582056   | 1582175   | PRPF8  | 1 |
| chr17 | 1582311   | 1582500   | PRPF8  | 1 |
| chr17 | 1582585   | 1582704   | PRPF8  | 1 |
| chr17 | 1582903   | 1583093   | PRPF8  | 1 |
| chr17 | 1584020   | 1584125   | PRPF8  | 1 |
| chr17 | 1584223   | 1584348   | PRPF8  | 1 |
| chr17 | 1584772   | 1584984   | PRPF8  | 1 |
| chr17 | 1585114   | 1585332   | PRPF8  | 1 |
| chr17 | 1585423   | 1585587   | PRPF8  | 1 |
| chr17 | 1586827   | 1586995   | PRPF8  | 1 |
| chr17 | 1587766   | 1587865   | PRPF8  | 1 |
| chr12 | 112856916 | 112856929 | PTPN11 | 1 |
| chr12 | 112884080 | 112884202 | PTPN11 | 1 |
| chr12 | 112888122 | 112888316 | PTPN11 | 1 |
| chr12 | 112890999 | 112891191 | PTPN11 | 1 |
| chr12 | 112892368 | 112892484 | PTPN11 | 1 |
| chr12 | 112893754 | 112893867 | PTPN11 | 1 |
| chr12 | 112910748 | 112910844 | PTPN11 | 1 |
| chr12 | 112915455 | 112915534 | PTPN11 | 1 |
| chr12 | 112915661 | 112915819 | PTPN11 | 1 |
| chr12 | 112919878 | 112920009 | PTPN11 | 1 |
| chr12 | 112924279 | 112924433 | PTPN11 | 1 |
| chr12 | 112924279 | 112924434 | PTPN11 | 1 |
| chr12 | 112926247 | 112926314 | PTPN11 | 1 |
| chr12 | 112926828 | 112926979 | PTPN11 | 1 |
| chr12 | 112939948 | 112940060 | PTPN11 | 1 |



|       |           |           |               |    |
|-------|-----------|-----------|---------------|----|
| chr12 | 112942499 | 112942565 | <i>PTPN11</i> | 1  |
| chr8  | 117859742 | 117859930 | <i>RAD21</i>  | 1  |
| chr8  | 117861185 | 117861268 | <i>RAD21</i>  | 1  |
| chr8  | 117862857 | 117863006 | <i>RAD21</i>  | 1  |
| chr8  | 117864187 | 117864335 | <i>RAD21</i>  | 1  |
| chr8  | 117864788 | 117864947 | <i>RAD21</i>  | 1  |
| chr8  | 117866484 | 117866707 | <i>RAD21</i>  | 1  |
| chr8  | 117868405 | 117868527 | <i>RAD21</i>  | 1  |
| chr8  | 117868885 | 117869010 | <i>RAD21</i>  | 1  |
| chr8  | 117869506 | 117869712 | <i>RAD21</i>  | 1  |
| chr8  | 117870591 | 117870697 | <i>RAD21</i>  | 1  |
| chr8  | 117874080 | 117874179 | <i>RAD21</i>  | 1  |
| chr8  | 117875369 | 117875498 | <i>RAD21</i>  | 1  |
| chr8  | 117878825 | 117878968 | <i>RAD21</i>  | 1  |
| chr21 | 36164435  | 36164907  | <i>RUNX1</i>  | 3  |
| chr21 | 36171598  | 36171759  | <i>RUNX1</i>  | 1  |
| chr21 | 36193968  | 36193993  | <i>RUNX1</i>  | 1  |
| chr21 | 36206707  | 36206898  | <i>RUNX1</i>  | 1  |
| chr21 | 36231771  | 36231875  | <i>RUNX1</i>  | 1  |
| chr21 | 36252854  | 36253010  | <i>RUNX1</i>  | 1  |
| chr21 | 36259140  | 36259409  | <i>RUNX1</i>  | 2  |
| chr21 | 36259140  | 36259393  | <i>RUNX1</i>  | 2  |
| chr21 | 36265222  | 36265260  | <i>RUNX1</i>  | 1  |
| chr21 | 36421139  | 36421196  | <i>RUNX1</i>  | 1  |
| chr7  | 92730644  | 92735410  | <i>SAMD9</i>  | 21 |
| chr7  | 92760533  | 92765284  | <i>SAMD9L</i> | 21 |
| chr18 | 42281312  | 42281797  | <i>SETBP1</i> | 3  |
| chr18 | 42449195  | 42449248  | <i>SETBP1</i> | 1  |
| chr18 | 42456530  | 42456715  | <i>SETBP1</i> | 1  |
| chr18 | 42529846  | 42533305  | <i>SETBP1</i> | 16 |
| chr18 | 42618450  | 42618620  | <i>SETBP1</i> | 1  |
| chr18 | 42643044  | 42643660  | <i>SETBP1</i> | 3  |
| chr2  | 198257030 | 198257185 | <i>SF3B1</i>  | 1  |
| chr2  | 198257696 | 198257912 | <i>SF3B1</i>  | 1  |
| chr2  | 198260780 | 198261052 | <i>SF3B1</i>  | 2  |
| chr2  | 198262709 | 198262840 | <i>SF3B1</i>  | 1  |
| chr2  | 198263185 | 198263305 | <i>SF3B1</i>  | 1  |
| chr2  | 198264779 | 198264890 | <i>SF3B1</i>  | 1  |
| chr2  | 198264976 | 198265158 | <i>SF3B1</i>  | 1  |
| chr2  | 198265439 | 198265660 | <i>SF3B1</i>  | 1  |
| chr2  | 198266124 | 198266249 | <i>SF3B1</i>  | 1  |
| chr2  | 198266466 | 198266612 | <i>SF3B1</i>  | 1  |
| chr2  | 198266709 | 198266854 | <i>SF3B1</i>  | 1  |
| chr2  | 198267280 | 198267550 | <i>SF3B1</i>  | 2  |
| chr2  | 198267673 | 198267759 | <i>SF3B1</i>  | 1  |
| chr2  | 198268309 | 198268488 | <i>SF3B1</i>  | 1  |
| chr2  | 198269800 | 198269901 | <i>SF3B1</i>  | 1  |
| chr2  | 198269999 | 198270196 | <i>SF3B1</i>  | 1  |
| chr2  | 198272722 | 198272843 | <i>SF3B1</i>  | 1  |
| chr2  | 198273093 | 198273305 | <i>SF3B1</i>  | 1  |
| chr2  | 198274494 | 198274731 | <i>SF3B1</i>  | 2  |
| chr2  | 198281465 | 198281635 | <i>SF3B1</i>  | 1  |

|       |           |           |       |   |
|-------|-----------|-----------|-------|---|
| chr2  | 198283233 | 198283312 | SF3B1 | 1 |
| chr2  | 198283659 | 198283675 | SF3B1 | 1 |
| chr2  | 198285152 | 198285266 | SF3B1 | 1 |
| chr2  | 198285753 | 198285857 | SF3B1 | 1 |
| chr2  | 198288532 | 198288698 | SF3B1 | 1 |
| chr2  | 198299696 | 198299723 | SF3B1 | 1 |
| chr10 | 112327575 | 112327589 | SMC3  | 1 |
| chr10 | 112328696 | 112328771 | SMC3  | 1 |
| chr10 | 112333465 | 112333503 | SMC3  | 1 |
| chr10 | 112335094 | 112335161 | SMC3  | 1 |
| chr10 | 112337179 | 112337250 | SMC3  | 1 |
| chr10 | 112337593 | 112337672 | SMC3  | 1 |
| chr10 | 112338386 | 112338464 | SMC3  | 1 |
| chr10 | 112340662 | 112340779 | SMC3  | 1 |
| chr10 | 112341681 | 112341856 | SMC3  | 1 |
| chr10 | 112342320 | 112342400 | SMC3  | 1 |
| chr10 | 112343142 | 112343306 | SMC3  | 1 |
| chr10 | 112343599 | 112343720 | SMC3  | 1 |
| chr10 | 112343941 | 112344154 | SMC3  | 1 |
| chr10 | 112349363 | 112349466 | SMC3  | 1 |
| chr10 | 112349650 | 112349749 | SMC3  | 1 |
| chr10 | 112350170 | 112350330 | SMC3  | 1 |
| chr10 | 112350749 | 112350890 | SMC3  | 1 |
| chr10 | 112352831 | 112352981 | SMC3  | 1 |
| chr10 | 112356156 | 112356308 | SMC3  | 1 |
| chr10 | 112357897 | 112358048 | SMC3  | 1 |
| chr10 | 112359412 | 112359570 | SMC3  | 1 |
| chr10 | 112360197 | 112360304 | SMC3  | 1 |
| chr10 | 112360780 | 112360888 | SMC3  | 1 |
| chr10 | 112361395 | 112361642 | SMC3  | 2 |
| chr10 | 112361724 | 112361936 | SMC3  | 1 |
| chr10 | 112362232 | 112362423 | SMC3  | 1 |
| chr10 | 112362583 | 112362760 | SMC3  | 1 |
| chr10 | 112362942 | 112363048 | SMC3  | 1 |
| chr10 | 112363989 | 112364057 | SMC3  | 1 |
| chr17 | 74732246  | 74732546  | SRSF2 | 2 |
| chr17 | 74732881  | 74733242  | SRSF2 | 2 |
| chrX  | 123156478 | 123156521 | STAG2 | 1 |
| chrX  | 123159690 | 123159768 | STAG2 | 1 |
| chrX  | 123164811 | 123164975 | STAG2 | 1 |
| chrX  | 123171377 | 123171473 | STAG2 | 1 |
| chrX  | 123176419 | 123176495 | STAG2 | 1 |
| chrX  | 123179014 | 123179218 | STAG2 | 1 |
| chrX  | 123181204 | 123181355 | STAG2 | 1 |
| chrX  | 123182855 | 123182928 | STAG2 | 1 |
| chrX  | 123184036 | 123184159 | STAG2 | 1 |
| chrX  | 123184971 | 123185069 | STAG2 | 1 |
| chrX  | 123185165 | 123185244 | STAG2 | 1 |
| chrX  | 123189978 | 123190085 | STAG2 | 1 |
| chrX  | 123191716 | 123191827 | STAG2 | 1 |
| chrX  | 123195074 | 123195191 | STAG2 | 1 |
| chrX  | 123195621 | 123195724 | STAG2 | 1 |

|       |           |           |       |   |
|-------|-----------|-----------|-------|---|
| chrX  | 123196752 | 123196844 | STAG2 | 1 |
| chrX  | 123196966 | 123197055 | STAG2 | 1 |
| chrX  | 123197698 | 123197901 | STAG2 | 1 |
| chrX  | 123199726 | 123199796 | STAG2 | 1 |
| chrX  | 123200025 | 123200112 | STAG2 | 1 |
| chrX  | 123200206 | 123200286 | STAG2 | 1 |
| chrX  | 123202414 | 123202506 | STAG2 | 1 |
| chrX  | 123204999 | 123205173 | STAG2 | 1 |
| chrX  | 123210182 | 123210321 | STAG2 | 1 |
| chrX  | 123211807 | 123211908 | STAG2 | 1 |
| chrX  | 123215230 | 123215378 | STAG2 | 1 |
| chrX  | 123217271 | 123217399 | STAG2 | 1 |
| chrX  | 123220397 | 123220620 | STAG2 | 1 |
| chrX  | 123224425 | 123224614 | STAG2 | 1 |
| chrX  | 123224704 | 123224814 | STAG2 | 1 |
| chrX  | 123227868 | 123227994 | STAG2 | 1 |
| chrX  | 123229222 | 123229299 | STAG2 | 1 |
| chrX  | 123234424 | 123234444 | STAG2 | 1 |
| chr17 | 40467766  | 40467818  | STAT3 | 1 |
| chr17 | 40468807  | 40468919  | STAT3 | 1 |
| chr17 | 40468848  | 40468869  | STAT3 | 1 |
| chr17 | 40469200  | 40469242  | STAT3 | 1 |
| chr17 | 40474300  | 40474512  | STAT3 | 1 |
| chr17 | 40474303  | 40474512  | STAT3 | 1 |
| chr17 | 40475022  | 40475161  | STAT3 | 1 |
| chr17 | 40475278  | 40475372  | STAT3 | 1 |
| chr17 | 40475591  | 40475643  | STAT3 | 1 |
| chr17 | 40476729  | 40476864  | STAT3 | 1 |
| chr17 | 40476981  | 40477079  | STAT3 | 1 |
| chr17 | 40478134  | 40478217  | STAT3 | 1 |
| chr17 | 40481428  | 40481475  | STAT3 | 1 |
| chr17 | 40481572  | 40481665  | STAT3 | 1 |
| chr17 | 40481765  | 40481794  | STAT3 | 1 |
| chr17 | 40483490  | 40483549  | STAT3 | 1 |
| chr17 | 40485691  | 40485783  | STAT3 | 1 |
| chr17 | 40485909  | 40486067  | STAT3 | 1 |
| chr17 | 40489453  | 40489604  | STAT3 | 1 |
| chr17 | 40489781  | 40489875  | STAT3 | 1 |
| chr17 | 40490749  | 40490830  | STAT3 | 1 |
| chr17 | 40491332  | 40491427  | STAT3 | 1 |
| chr17 | 40497577  | 40497675  | STAT3 | 1 |
| chr17 | 40498587  | 40498731  | STAT3 | 1 |
| chr17 | 40500407  | 40500534  | STAT3 | 1 |
| chr17 | 30264266  | 30264539  | SUZ12 | 2 |
| chr17 | 30267305  | 30267351  | SUZ12 | 1 |
| chr17 | 30267441  | 30267505  | SUZ12 | 1 |
| chr17 | 30274636  | 30274704  | SUZ12 | 1 |
| chr17 | 30293166  | 30293215  | SUZ12 | 1 |
| chr17 | 30300165  | 30300250  | SUZ12 | 1 |
| chr17 | 30302501  | 30302732  | SUZ12 | 2 |
| chr17 | 30303540  | 30303633  | SUZ12 | 1 |
| chr17 | 30310018  | 30310123  | SUZ12 | 1 |

|       |           |           |       |    |
|-------|-----------|-----------|-------|----|
| chr17 | 30315339  | 30315516  | SUZ12 | 1  |
| chr17 | 30320261  | 30320352  | SUZ12 | 1  |
| chr17 | 30320884  | 30321027  | SUZ12 | 1  |
| chr17 | 30321583  | 30321740  | SUZ12 | 1  |
| chr17 | 30322583  | 30322781  | SUZ12 | 1  |
| chr17 | 30323817  | 30323896  | SUZ12 | 1  |
| chr17 | 30325677  | 30326019  | SUZ12 | 2  |
| chr4  | 106155100 | 106158594 | TET2  | 16 |
| chr4  | 106155100 | 106158508 | TET2  | 15 |
| chr4  | 106162496 | 106162586 | TET2  | 1  |
| chr4  | 106163991 | 106164084 | TET2  | 1  |
| chr4  | 106164727 | 106164935 | TET2  | 1  |
| chr4  | 106180776 | 106180926 | TET2  | 1  |
| chr4  | 106182916 | 106183005 | TET2  | 1  |
| chr4  | 106190767 | 106190904 | TET2  | 1  |
| chr4  | 106193721 | 106194075 | TET2  | 2  |
| chr4  | 106196205 | 106197673 | TET2  | 7  |
| chr17 | 7572930   | 7573008   | TP53  | 1  |
| chr17 | 7573927   | 7574033   | TP53  | 1  |
| chr17 | 7576540   | 7576584   | TP53  | 1  |
| chr17 | 7576628   | 7576657   | TP53  | 1  |
| chr17 | 7576853   | 7576926   | TP53  | 1  |
| chr17 | 7577019   | 7577155   | TP53  | 1  |
| chr17 | 7577499   | 7577608   | TP53  | 1  |
| chr17 | 7578177   | 7578289   | TP53  | 1  |
| chr17 | 7578371   | 7578554   | TP53  | 1  |
| chr17 | 7578371   | 7578533   | TP53  | 1  |
| chr17 | 7579312   | 7579569   | TP53  | 2  |
| chr17 | 7579312   | 7579590   | TP53  | 2  |
| chr17 | 7579700   | 7579721   | TP53  | 1  |
| chr17 | 7579839   | 7579912   | TP53  | 1  |
| chr21 | 44513215  | 44513359  | U2AF1 | 1  |
| chr21 | 44514581  | 44514673  | U2AF1 | 1  |
| chr21 | 44514765  | 44514898  | U2AF1 | 1  |
| chr21 | 44515548  | 44515646  | U2AF1 | 1  |
| chr21 | 44515804  | 44515833  | U2AF1 | 1  |
| chr21 | 44515804  | 44515853  | U2AF1 | 1  |
| chr21 | 44520563  | 44520629  | U2AF1 | 1  |
| chr21 | 44521476  | 44521542  | U2AF1 | 1  |
| chr21 | 44524425  | 44524512  | U2AF1 | 1  |
| chr21 | 44527561  | 44527604  | U2AF1 | 1  |
| chr19 | 56166471  | 56166519  | U2AF2 | 1  |
| chr19 | 56170576  | 56170711  | U2AF2 | 1  |
| chr19 | 56171543  | 56171587  | U2AF2 | 1  |
| chr19 | 56171882  | 56171985  | U2AF2 | 1  |
| chr19 | 56172404  | 56172555  | U2AF2 | 1  |
| chr19 | 56173868  | 56173984  | U2AF2 | 1  |
| chr19 | 56174972  | 56175110  | U2AF2 | 1  |
| chr19 | 56179873  | 56179952  | U2AF2 | 1  |
| chr19 | 56180036  | 56180158  | U2AF2 | 1  |
| chr19 | 56180449  | 56180535  | U2AF2 | 1  |
| chr19 | 56180449  | 56180547  | U2AF2 | 1  |

|       |          |          |              |   |
|-------|----------|----------|--------------|---|
| chr19 | 56180810 | 56181058 | <i>U2AF2</i> | 2 |
| chr19 | 56185300 | 56185431 | <i>U2AF2</i> | 1 |
| chr11 | 32410607 | 32410725 | <i>WT1</i>   | 1 |
| chr11 | 32413518 | 32413610 | <i>WT1</i>   | 1 |
| chr11 | 32413527 | 32413610 | <i>WT1</i>   | 1 |
| chr11 | 32414212 | 32414301 | <i>WT1</i>   | 1 |
| chr11 | 32417803 | 32417953 | <i>WT1</i>   | 1 |
| chr11 | 32421494 | 32421590 | <i>WT1</i>   | 1 |
| chr11 | 32438036 | 32438086 | <i>WT1</i>   | 1 |
| chr11 | 32439123 | 32439200 | <i>WT1</i>   | 1 |
| chr11 | 32449502 | 32449604 | <i>WT1</i>   | 1 |
| chr11 | 32450043 | 32450165 | <i>WT1</i>   | 1 |
| chr11 | 32452076 | 32452085 | <i>WT1</i>   | 1 |
| chr11 | 32456246 | 32456891 | <i>WT1</i>   | 3 |
| chrX  | 15808619 | 15808659 | <i>ZRSR2</i> | 1 |
| chrX  | 15809057 | 15809136 | <i>ZRSR2</i> | 1 |
| chrX  | 15817995 | 15818076 | <i>ZRSR2</i> | 1 |
| chrX  | 15821811 | 15821919 | <i>ZRSR2</i> | 1 |
| chrX  | 15822234 | 15822320 | <i>ZRSR2</i> | 1 |
| chrX  | 15826356 | 15826394 | <i>ZRSR2</i> | 1 |
| chrX  | 15827323 | 15827441 | <i>ZRSR2</i> | 1 |
| chrX  | 15833800 | 15834013 | <i>ZRSR2</i> | 1 |
| chrX  | 15836710 | 15836765 | <i>ZRSR2</i> | 1 |
| chrX  | 15838330 | 15838439 | <i>ZRSR2</i> | 1 |
| chrX  | 15840854 | 15841362 | <i>ZRSR2</i> | 3 |

---

**Supplementary Table 4. Rare SAMD9/SAMD9L germline variants in our cohort (n = 26)**

| UPN      | Age <sup>#</sup> | Sex | Diagnosis <sup>†</sup> | Gene   | Alterations  | VAFs of germline <sup>¶</sup> | VAFs of tumor | Chr7 copy number alteration <sup>‡</sup> | Frequency in healthy controls* | Family history    | Bone marrow cellularity | Infectious history                                                               | IgG (mg/dL) <sup>§</sup> |
|----------|------------------|-----|------------------------|--------|--------------|-------------------------------|---------------|------------------------------------------|--------------------------------|-------------------|-------------------------|----------------------------------------------------------------------------------|--------------------------|
| UPN004   | 78               | F   | MDS                    | SAMD9L | I327V        | 49%                           | 53%           | -7                                       | .02%                           | -                 | 60%                     | -                                                                                | NA                       |
| UPN005   | 77               | M   | sAML                   | SAMD9L | L1323fs      | 50%                           | 90%           | -7                                       | <.01%                          | -                 | 50%                     | -                                                                                | NA                       |
| UPN006   | 73               | M   | MDS                    | SAMD9  | Q154X, I268T | 46%, 47%                      | 40%, 41%      | No                                       | .01%, <.01%                    | NA                | 50%                     | NA                                                                               | NA                       |
| UPN007   | 88               | F   | MDS/MPN                | SAMD9  | H32L         | 38%                           | 45%           | No                                       | .04%                           | NA                | 90%                     | NA                                                                               | NA                       |
| UPN012   | 83               | F   | MDS                    | SAMD9  | T205P        | 39%                           | 49%           | No                                       | .08%                           | -                 | 80%                     | NA                                                                               | NA                       |
| UPN013   | 78               | F   | MDS                    | SAMD9  | T205P        | 47%                           | 46%           | No                                       | .08%                           | -                 | 70%                     | NA                                                                               | NA                       |
| UPN014   | 49               | F   | MDS                    | SAMD9  | R221Q        | 54%                           | 48%           | No                                       | .02%                           | -                 | 70%                     | Pneumonia due to <i>Pseudomonas aeruginosa</i>                                   | 308                      |
| UPN015   | 66               | M   | MDS/MPN                | SAMD9  | I268T        | 44%                           | 47%           | No                                       | <.01%                          | NA                | 60%                     | NA                                                                               | NA                       |
| UPN017   | 75               | M   | MDS/MPN                | SAMD9  | D550V        | 44%                           | 51%           | No                                       | 0%                             | -                 | 20%                     | -                                                                                | NA                       |
| UPN020   | 79               | M   | MDS                    | SAMD9  | N1244D       | 42%                           | 48%           | No                                       | <.01%                          | NA                | 30%                     | NA                                                                               | NA                       |
| UPN022   | 73               | M   | MDS                    | SAMD9L | L50S         | 48%                           | 49%           | No                                       | 0%                             | NA                | 40%                     | NA                                                                               | NA                       |
| UPN023   | 86               | F   | MDS                    | SAMD9L | P123L        | 46%                           | 52%           | No                                       | .02%                           | Breast cancer (M) | 30%                     | -                                                                                | NA                       |
| UPN024   | 61               | F   | MDS                    | SAMD9L | E220G        | 47%                           | 46%           | No                                       | .01%                           | -                 | 70%                     | NA                                                                               | NA                       |
| UPN025   | 42               | M   | MDS                    | SAMD9L | G235S        | 45%                           | 47%           | No                                       | .01%                           | -                 | 40%                     | NA                                                                               | NA                       |
| UPN026   | 70               | F   | AA/PNH                 | SAMD9L | W333C        | -                             | 45%           | No                                       | 0%                             | -                 | <5%                     | -                                                                                | NA                       |
| UPN028   | 34               | F   | AA/PNH                 | SAMD9L | A637T        | -                             | 53%           | No                                       | .02%                           | -                 | 30%                     | -                                                                                | 985                      |
| UPN029   | 59               | M   | MDS                    | SAMD9L | S728P, Y705C | 48%, 51%                      | 55%, 47%      | No                                       | .02%, .01%                     | NA                | 50%                     | NA                                                                               | NA                       |
| UPN_ADD1 | 61               | F   | MDS                    | SAMD9  | A949S        | -                             | 36%           | No                                       | .08%                           | -                 | 60%                     | -                                                                                | 1490                     |
| UPN_ADD2 | 75               | F   | MDS                    | SAMD9  | R106H        | -                             | 53%           | No                                       | .02%                           | -                 | 90%                     | -                                                                                | NA                       |
| UPN_ADD3 | 41               | F   | MDS                    | SAMD9  | R902Q        | -                             | 49%           | No                                       | <.01%                          | -                 | 10%                     | Positive blood culture including VRE, <i>Klebsiella</i> , and <i>C. albicans</i> | 352                      |
| UPN_ADD4 | 78               | F   | MDS                    | SAMD9L | R1298G       | -                             | 54%           | No                                       | <.01%                          | -                 | 60%                     | -                                                                                | 544                      |
| UPN_ADD5 | 52               | M   | AA/PNH                 | SAMD9L | A637S        | -                             | 45%           | No                                       | <.01%                          | -                 | 20%                     | -                                                                                | NA                       |
| UPN_ADD6 | 57               | M   | MDS                    | SAMD9L | G247A        | -                             | 48%           | No                                       | 0%                             | -                 | 50%                     | Pneumonia due to <i>Pneumocystis jirovecii</i>                                   | 1,120                    |
| UPN_ADD7 | 70               | M   | sAML                   | SAMD9  | T1370fs      | -                             | 51%           | No                                       | .02%                           | -                 | 40%                     | -                                                                                | 590                      |

<sup>#</sup>Median age and range; 72 (34-88) in patients with SAMD9/SAMD9L variants (n = 24) vs. 68 (17-94) in patients without them (n = 775), *P* = 0.3 (T test)

<sup>†</sup>Previous treatment history; 0% (0/24) in patients with SAMD9/SAMD9L variants vs. 0.6% (5/775) in patients without them, *P* = 1 (Fisher's exact test)

<sup>¶</sup>"-" depicts that germline DNAs were not available.

<sup>‡</sup>Aberrant karyotype; 46% (11/24) in patients with SAMD9/SAMD9L variants vs. 28% (220/775) in patients without them, *P* = 0.07 (Fisher's exact test); Cytogenetic subsets in detail were shown (Supplemental table 7)

\*Ethnically-matched healthy controls from gnomAD (n = 99,860) (Supplemental Figure 1)

<sup>§</sup>Immunoglobulin G; normal range: 717-1,411 (mg/dl)

Abbreviations; UPN, universal patient number; sAML, secondary acute myeloid leukemia; MDS, myelodysplastic syndrome; -7, monosomy 7; VAFs, variant allele frequencies; NA, not applicable; M, mother; VRE, vancomycin resistant Enterococci; *C. albicans*, *Candida albicans*.

**Supplementary Table 5. Truly pathogenic SAMD9 germ line variants (n=23)**

| Amino Acid change | Prediction (3>positive) |
|-------------------|-------------------------|
| SAMD9:A1195V      | Pathogenic              |
| SAMD9:I983S       | Pathogenic              |
| SAMD9:R982H       | Pathogenic              |
| SAMD9:R982C       | Pathogenic              |
| SAMD9:I897M       | Pathogenic              |
| SAMD9:Y684C       | Pathogenic              |
| SAMD9:L641P       | Pathogenic              |
| SAMD9:R1293Q      | VUS                     |
| SAMD9:R1293W      | VUS                     |
| SAMD9:Q1286K      | VUS                     |
| SAMD9:P1280L      | VUS                     |
| SAMD9:E1136Q      | VUS                     |
| SAMD9:F1017V      | VUS                     |
| SAMD9:E974K       | VUS                     |
| SAMD9:R824Q       | VUS                     |
| SAMD9:K821M       | VUS                     |
| SAMD9:D769N       | VUS                     |
| SAMD9:D769G       | VUS                     |
| SAMD9:A722E       | VUS                     |
| SAMD9:R685Q       | VUS                     |
| SAMD9:K1569N      | VUS                     |
| SAMD9:L1539I      | VUS                     |
| SAMD9:R459Q       | VUS                     |

Abbreviations; P, pathogenic; VUS, variants of unknown significance

**Supplementary Table 6. Area Under the Curve (AUC) for 8 prediction algorithms**

| Algorithms        | AUC   |
|-------------------|-------|
| PolyPhen-2        | 0.823 |
| Mutation Assessor | 0.810 |
| MutationTaster    | 0.780 |
| SIFT              | 0.777 |
| PROVEAN           | 0.764 |
| M-CAP             | 0.726 |
| DANN              | 0.712 |
| CADD              | 0.688 |



**Supplementary Table 7. *SAMD9* and *SAMD9L* missense rare variants with predicted pathogenesis based on top 5 algorithms**

| UPN      | Gene          | Alterations  | Predicted pathogenesis |
|----------|---------------|--------------|------------------------|
| UPN006   | <i>SAMD9</i>  | I268T        | P                      |
| UPN012   | <i>SAMD9</i>  | T205P        | P                      |
| UPN013   | <i>SAMD9</i>  | T205P        | P                      |
| UPN015   | <i>SAMD9</i>  | I268T        | P                      |
| UPN017   | <i>SAMD9</i>  | D550V        | P                      |
| UPN022   | <i>SAMD9L</i> | L50S         | P                      |
| UPN024   | <i>SAMD9L</i> | E220G        | P                      |
| UPN025   | <i>SAMD9L</i> | G235S        | P                      |
| UPN026   | <i>SAMD9L</i> | W333C        | P                      |
| UPN_ADD6 | <i>SAMD9L</i> | G247A        | P                      |
| UPN029   | <i>SAMD9L</i> | S728P, Y705C | VUS, P                 |
| UPN007   | <i>SAMD9</i>  | H32L         | VUS                    |
| UPN014   | <i>SAMD9</i>  | R221Q        | VUS                    |
| UPN020   | <i>SAMD9</i>  | N1244D       | VUS                    |
| UPN_ADD1 | <i>SAMD9</i>  | A949S        | VUS                    |
| UPN_ADD2 | <i>SAMD9</i>  | R106H        | VUS                    |
| UPN_ADD3 | <i>SAMD9</i>  | R902Q        | VUS                    |
| UPN004   | <i>SAMD9L</i> | I327V        | VUS                    |
| UPN023   | <i>SAMD9L</i> | P123L        | VUS                    |
| UPN028   | <i>SAMD9L</i> | A637T        | VUS                    |
| UPN_ADD4 | <i>SAMD9L</i> | R1298G       | VUS                    |
| UPN_ADD5 | <i>SAMD9L</i> | A637S        | VUS                    |

Abbreviations; P, pathogenic; VUS, variants of unknown significance

**Supplementary Table 8. Rare SAMD9/SAMD9L GL variants in myeloid neoplasms database (n = 7)**

| Sample | Age | Sex | Genes         | Alterations | Location   | Diagnosis | Subtypes                                                 | Frequency in healthy controls | Predicted pathogenesis |
|--------|-----|-----|---------------|-------------|------------|-----------|----------------------------------------------------------|-------------------------------|------------------------|
| UPN39  | 88  | F   | <i>SAMD9</i>  | H32L        | N-terminus | MDS/MPN   | CMML                                                     | 0.04%                         | VUS                    |
| AML139 | 58  | M   | <i>SAMD9</i>  | I247T       | N-terminus | AML       | Normal Karyotype, <i>NPM1</i> mutations                  | <.01%                         | P                      |
| UPN41  | 66  | M   | <i>SAMD9</i>  | I268T       | N-terminus | MDS/MPN   | CMML                                                     | <.01%                         | P                      |
| PD9412 | NA  | NA  | <i>SAMD9</i>  | L574P       | Central    | MPN       | PMF                                                      | <.01%                         | P                      |
| AML082 | 37  | M   | <i>SAMD9</i>  | Q1427P      | C-terminus | AML       | 46, XY, del (11) (q14 q25), <i>CEBPA</i> (double mutant) | 0%                            | VUS                    |
| PD4780 | NA  | NA  | <i>SAMD9L</i> | C228Y       | N-terminus | MPN       | PMF                                                      | <.01%                         | P                      |
| PD4996 | NA  | NA  | <i>SAMD9L</i> | R285Q       | N-terminus | MPN       | PMF                                                      | <.01%                         | VUS                    |

Abbreviations; NA, not applicable; CMML, Chronic myelomonocytic leukemia; PMF, primary myelofibrosis; P, pathogenic; VUS, variants of ur

**Supplementary Table 9. Three gene locations of *SAMD9* and *SAMD9L***

| Gene          | Locations  | Amino acids |
|---------------|------------|-------------|
| <i>SAMD9</i>  | N-terminal | 1-530       |
| <i>SAMD9</i>  | Center     | 531-1,060   |
| <i>SAMD9</i>  | C-terminal | 1,061-1,589 |
| <i>SAMD9L</i> | N-terminal | 1-528       |
| <i>SAMD9L</i> | Center     | 529-1,056   |
| <i>SAMD9L</i> | C-terminal | 1,057-1,584 |

**Supplementary Table 10. Cytogenetics of adult MDS patients with *SAMD9*/*SAMD9L* variants and -7**

| UPN      | Cytogenetics                                                                                                                                                                                          | Gene          | Alterations  | VAFs of germline | VAFs of tumor |
|----------|-------------------------------------------------------------------------------------------------------------------------------------------------------------------------------------------------------|---------------|--------------|------------------|---------------|
| UPN004   | 44,XX,-4,del(5)(q12q33),-17,add(19)(p13)[3]/45,sl,-add(19)(p13),+19,+mar1[7]/44,sl1,-6,+inv(6)(p23q25),-7,-10,+del(10)(q25),-14,+add(14)(q32),-15,-22,+der(22)t(15;22)(q11.2;q13),+mar2[cp6]/46,XX[4] | <i>SAMD9L</i> | I327V        | 49%              | 53%           |
| UPN005   | 42,XY,add(1)(q32),del(3)(q12),add(4)(q21),del(5)(q22q35),-7,der(12)t(12;13)(p13;q12),-13,-13,-16,-18,+mar1[cp20]                                                                                      | <i>SAMD9L</i> | L1323fs      | 50%              | 90%           |
| UPN006   | 46,XY[20]                                                                                                                                                                                             | <i>SAMD9</i>  | Q154X, I268T | 46%, 47%         | 40%, 41%      |
| UPN007   | 46,XX[20]                                                                                                                                                                                             | <i>SAMD9</i>  | H32L         | 38%              | 45%           |
| UPN012   | 46,XX,del(5)(q13q33)[14]/46,XX[6]                                                                                                                                                                     | <i>SAMD9</i>  | T205P        | 39%              | 49%           |
| UPN013   | 46,XX,del(5)(q13q33)[6]/46,XX[14]                                                                                                                                                                     | <i>SAMD9</i>  | T205P        | 47%              | 46%           |
| UPN014   | 47, XX, +21[20]                                                                                                                                                                                       | <i>SAMD9</i>  | R221Q        | 54%              | 48%           |
| UPN015   | 46,XY[20]                                                                                                                                                                                             | <i>SAMD9</i>  | I268T        | 44%              | 47%           |
| UPN017   | 46,XY[cp30]                                                                                                                                                                                           | <i>SAMD9</i>  | D550V        | 44%              | 51%           |
| UPN020   | 46, XY[20]                                                                                                                                                                                            | <i>SAMD9</i>  | N1244D       | 42%              | 48%           |
| UPN022   | 45, X, -Y[20]                                                                                                                                                                                         | <i>SAMD9L</i> | L50S         | 48%              | 49%           |
| UPN023   | 46,XX[20]                                                                                                                                                                                             | <i>SAMD9L</i> | P123L        | 46%              | 52%           |
| UPN024   | 46,XY,del(5)(q13q33)[1]/46,XX[4]                                                                                                                                                                      | <i>SAMD9L</i> | E220G        | 47%              | 46%           |
| UPN025   | 46,XY,del(5)(q13q33),-18,del(20)(q11.2q13.1)[4]/46,XY[16]                                                                                                                                             | <i>SAMD9L</i> | G235S        | 45%              | 47%           |
| UPN026   | 46,XX[20]                                                                                                                                                                                             | <i>SAMD9L</i> | W333C        | -                | 45%           |
| UPN028   | 46,XX[20]                                                                                                                                                                                             | <i>SAMD9L</i> | A637T        | -                | 53%           |
| UPN029   | 46,XY[20]                                                                                                                                                                                             | <i>SAMD9L</i> | S728P, Y705C | 48%, 51%         | 55%, 47%      |
| UPN_ADD1 | 46,XX[20]                                                                                                                                                                                             | <i>SAMD9</i>  | A949S        | -                | 36%           |
| UPN_ADD2 | 44-46,XX, del(5)(q21q23),add(7)(q11.2), add(12)(p13),+1-2 mar(CP)[20]                                                                                                                                 | <i>SAMD9</i>  | R106H        | -                | 53%           |
| UPN_ADD3 | 46,XY[20]                                                                                                                                                                                             | <i>SAMD9</i>  | R902Q        | -                | 49%           |
| UPN_ADD4 | 46,XX,del(20)(q11.2q13.1)[5]/46,XX[15]                                                                                                                                                                | <i>SAMD9L</i> | R1298G       | -                | 54%           |
| UPN_ADD5 | 46,XY[20]                                                                                                                                                                                             | <i>SAMD9L</i> | A637S        | -                | 45%           |
| UPN_ADD6 | 42-44,XY,der(5)del(5)(q13.3)t(5;12)(q13.3;q13),der(12)t(5;12),-15,-16,-17,-18,der(19)t(17;19)(q21;p13.3),add(20)(q13.3),add(21)(q22)[cp20]                                                            | <i>SAMD9L</i> | G247A        | -                | 48%           |
| UPN_ADD7 | 46,XY[20]                                                                                                                                                                                             | <i>SAMD9</i>  | T1370fs      | -                | 51%           |

"-" depicts germline DNAs were not available. Abbreviations; VAFs, variant allele frequencies

**Supplemental Table 11. Summary of cell proliferation assay (n=13)**

| Gene          | Mutants | Prediction          | Deteced cohort                     | Results of cell proliferation assay |
|---------------|---------|---------------------|------------------------------------|-------------------------------------|
| <i>SAMD9</i>  | T205P   | Pathogenic missense | Our MDS cohort                     | LOF                                 |
| <i>SAMD9</i>  | I247T   | Pathogenic missense | Public database                    | LOF                                 |
| <i>SAMD9</i>  | I268T   | Pathogenic missense | Our MDS cohort and public database | WT                                  |
| <i>SAMD9</i>  | D550V   | Pathogenic missense | Our MDS cohort                     | WT                                  |
| <i>SAMD9</i>  | L574P   | Pathogenic missense | Public database                    | LOF                                 |
| <i>SAMD9L</i> | L50S    | Pathogenic missense | Our MDS cohort                     | WT                                  |
| <i>SAMD9L</i> | C228Y   | Pathogenic missense | Public database                    | LOF                                 |
| <i>SAMD9L</i> | E220G   | Pathogenic missense | Our MDS cohort                     | LOF                                 |
| <i>SAMD9L</i> | G235S   | Pathogenic missense | Our MDS cohort                     | LOF                                 |
| <i>SAMD9L</i> | G247A   | Pathogenic missense | Our MDS cohort                     | WT                                  |
| <i>SAMD9L</i> | W333C   | Pathogenic missense | Our MDS cohort                     | LOF                                 |
| <i>SAMD9L</i> | W517R   | Pathogenic missense | Index familal cases                | LOF                                 |
| <i>SAMD9L</i> | L1323fs | Frameshift          | Our MDS cohort                     | LOF                                 |

**Supplemental Table 12. Comparison of pathogenic features of GL SAMD9/SAMD9L variants**

| Parameters                       | Pediatric MDS    | Adult MDS        |
|----------------------------------|------------------|------------------|
| Distribution of genetic variants | C-terminus       | N-terminus       |
| Genetic reversion                | Frequent         | Rare             |
| Latency                          | Short            | Long             |
| Function of GL alterations       | Gain-of-function | Loss-of-function |
